# Supplementary material for: Spatial patterns and driving factors of plant diversity along the urban–rural gradient in the context of urbanization in Zhengzhou, China
Source: PeerJ journal article supplement (doi:10.7717/peerj.18261), 2024-10-11
Supplement: Raw_data.zip [file Raw_data.zip]

## Sheet: All plants in four sample zones
	Sample	Sample	Species
E	ZZ016	EZZ016	Eriobotrya japonica
E	ZZ016	EZZ016	Eriobotrya japonica
E	ZZ016	EZZ016	Eriobotrya japonica
E	ZZ016	EZZ016	Eriobotrya japonica
E	ZZ016	EZZ016	Eriobotrya japonica
E	ZZ016	EZZ016	Prunus cerasifera cv. Atropurpurea
E	ZZ016	EZZ016	Prunus cerasifera cv. Atropurpurea
E	ZZ016	EZZ016	Prunus cerasifera cv. Atropurpurea
E	ZZ016	EZZ016	Pterocarya stenoptera
E	ZZ016	EZZ016	Magnolia grandiflora var. lanceolata
E	ZZ016	EZZ016	Magnolia grandiflora var. lanceolata
E	ZZ016	EZZ016	Magnolia grandiflora var. lanceolata
E	ZZ016	EZZ016	Magnolia grandiflora var. lanceolata
E	ZZ016	EZZ016	Michelia × alba
E	ZZ016	EZZ016	Michelia × alba
E	ZZ016	EZZ016	Michelia × alba
E	ZZ016	EZZ016	Abelia chinensis
E	ZZ016	EZZ016	Ligustrum quihoui
E	ZZ016	EZZ016	Ilex crenata
E	ZZ016	EZZ016	Loropetalum chinense var. rubrum
E	ZZ016	EZZ016	Fatsia japonica
E	ZZ016	EZZ016	Euonymus japonicus
E	ZZ016	EZZ016	Nandina domestica
E	ZZ016	EZZ016	Pittosporum tobira
E	ZZ016	EZZ016	Lagerstroemia indica
E	ZZ016	EZZ016	Ligustrum sinense
E	ZZ016	EZZ016	Viola × wittrockiana
E	ZZ016	EZZ016	Veronica persica
E	ZZ016	EZZ016	Symphyotrichum subulatum
E	ZZ016	EZZ016	Cynodon dactylon
E	ZZ016	EZZ016	Lolium perenne
E	ZZ016	EZZ016	Erigeron canadensis
E	ZZ016	EZZ016	Argyranthemum frutescens
E	ZZ016	EZZ016	Asparagus cochinchinensis
E	ZZ016	EZZ016	Glandularia × hybrida
E	ZZ016	EZZ016	Dimorphotheca pluvialis
E	ZZ016	EZZ016	Chrysanthemum multicaule
E	ZZ016	EZZ016	Lupinus polyphyllus
E	ZZ016	EZZ016	Sedum lineare
E	ZZ016	EZZ016	Setaria viridis
E	ZZ016	EZZ016	Aquilegia vulgaris
E	ZZ016	EZZ016	Cotoneaster franchetii
E	ZZ016	EZZ016	Penstemon digitalis
E	ZZ016	EZZ016	Festuca glauca
E	ZZ016	EZZ016	Trimezia martinicensis
E	ZZ016	EZZ016	Aspidistra elatior
E	ZZ016	EZZ016	Ophiopogon japonicus
E	ZZ021	EZZ021	Prunus cerasifera cv. Atropurpurea
E	ZZ021	EZZ021	Prunus cerasifera cv. Atropurpurea
E	ZZ021	EZZ021	Robinia pseudoacacia
E	ZZ021	EZZ021	Robinia pseudoacacia
E	ZZ021	EZZ021	Robinia pseudoacacia
E	ZZ021	EZZ021	Ficus carica
E	ZZ021	EZZ021	Osmanthus fragrans cv. Chenghong Dangui
E	ZZ021	EZZ021	Photinia glabra
E	ZZ021	EZZ021	Rosa chinensis
E	ZZ021	EZZ021	Erigeron canadensis
E	ZZ021	EZZ021	Impatiens balsamina
E	ZZ021	EZZ021	Phedimus aizoon
E	ZZ021	EZZ021	Mentha canadensis
E	ZZ021	EZZ021	Cynodon dactylon
E	ZZ021	EZZ021	Chenopodium album
E	ZZ021	EZZ021	Ophiopogon japonicus
E	ZZ022	EZZ022	Magnolia grandiflora var. lanceolata
E	ZZ022	EZZ022	Magnolia grandiflora var. lanceolata
E	ZZ022	EZZ022	Magnolia grandiflora var. lanceolata
E	ZZ022	EZZ022	Magnolia grandiflora var. lanceolata
E	ZZ022	EZZ022	Magnolia grandiflora var. lanceolata
E	ZZ022	EZZ022	Magnolia grandiflora var. lanceolata
E	ZZ022	EZZ022	Photinia serratifolia
E	ZZ022	EZZ022	Photinia serratifolia
E	ZZ022	EZZ022	Photinia serratifolia
E	ZZ022	EZZ022	Photinia serratifolia
E	ZZ022	EZZ022	Photinia serratifolia
E	ZZ022	EZZ022	Buxus megistophylla
E	ZZ022	EZZ022	Euonymus japonicus cv. Aurea-marginatus
E	ZZ022	EZZ022	Ligustrum sinense
E	ZZ022	EZZ022	Buxus sinica var. parvifolia
E	ZZ022	EZZ022	Photinia × fraseri
E	ZZ022	EZZ022	Punica granatum
E	ZZ022	EZZ022	Nerium oleander
E	ZZ022	EZZ022	Yucca gloriosa
E	ZZ022	EZZ022	Cercis chinensis
E	ZZ022	EZZ022	Buxus harlandii
E	ZZ022	EZZ022	Prunus persica
E	ZZ022	EZZ022	Lolium perenne
E	ZZ022	EZZ022	Zoysia japonica
E	ZZ022	EZZ022	Ophiopogon japonicus
E	ZZ022	EZZ022	Nymphaea tetragona
E	ZZ022	EZZ022	Typha orientalis
E	ZZ022	EZZ022	Phyllostachys reticulata
E	ZZ022	EZZ022	Oxalis corymbosa
E	ZZ022	EZZ022	Cynodon dactylon
E	ZZ022	EZZ022	Amaranthus blitum
E	ZZ022	EZZ022	Erigeron canadensis
E	ZZ022	EZZ022	Stellaria media
E	ZZ022	EZZ022	Polygonum aviculare
E	ZZ027	EZZ027	Acer pictum subsp. mono
E	ZZ027	EZZ027	Acer pictum subsp. mono
E	ZZ027	EZZ027	Acer pictum subsp. mono
E	ZZ027	EZZ027	Prunus × yedoensis
E	ZZ027	EZZ027	Prunus × yedoensis
E	ZZ027	EZZ027	Prunus × yedoensis
E	ZZ027	EZZ027	Prunus × yedoensis
E	ZZ027	EZZ027	Prunus cerasifera cv. Atropurpurea
E	ZZ027	EZZ027	Prunus cerasifera cv. Atropurpurea
E	ZZ027	EZZ027	Prunus cerasifera cv. Atropurpurea
E	ZZ027	EZZ027	Prunus cerasifera cv. Atropurpurea
E	ZZ027	EZZ027	Pinus bungeana
E	ZZ027	EZZ027	Pinus bungeana
E	ZZ027	EZZ027	Pinus bungeana
E	ZZ027	EZZ027	Pinus bungeana
E	ZZ027	EZZ027	Eriobotrya japonica
E	ZZ027	EZZ027	Eriobotrya japonica
E	ZZ027	EZZ027	Eriobotrya japonica
E	ZZ027	EZZ027	Buxus sinica var. parvifolia
E	ZZ027	EZZ027	Buxus megistophylla
E	ZZ027	EZZ027	Ilex cornuta
E	ZZ027	EZZ027	Ligustrum japonicum cv. Howardii
E	ZZ027	EZZ027	Loropetalum chinense var. rubrum
E	ZZ027	EZZ027	Lagerstroemia indica
E	ZZ027	EZZ027	Osmanthus fragrans cv. Chenghong Dangui
E	ZZ027	EZZ027	Nandina domestica
E	ZZ027	EZZ027	Ligustrum ovalifolium
E	ZZ027	EZZ027	Ligustrum sinense var. variegatum
E	ZZ027	EZZ027	Poa annua
E	ZZ027	EZZ027	Lolium perenne
E	ZZ027	EZZ027	Erigeron canadensis
E	ZZ027	EZZ027	Cynodon dactylon
E	ZZ027	EZZ027	Polygonum aviculare
E	ZZ027	EZZ027	Brassica oleracea
E	ZZ027	EZZ027	Viola × wittrockiana
E	ZZ027	EZZ027	Trifolium repens
E	ZZ027	EZZ027	Dianthus caryophyllus
E	ZZ027	EZZ027	Causonis japonica
E	ZZ027	EZZ027	Festuca glauca
E	ZZ027	EZZ027	Oxalis corymbosa
E	ZZ027	EZZ027	Mazus pumilus
E	ZZ027	EZZ027	Veronica hederifolia
E	ZZ027	EZZ027	Heuchera micrantha
E	ZZ027	EZZ027	Cortaderia selloana
E	ZZ027	EZZ027	Juncus effusus
E	ZZ027	EZZ027	Hosta cv. Regal Splendor
E	ZZ027	EZZ027	Eleusine indica
E	ZZ027	EZZ027	Chenopodium album
E	ZZ027	EZZ027	Glandularia tenera
E	ZZ027	EZZ027	Leonurus japonicus
E	ZZ027	EZZ027	Polypogon fugax
E	ZZ027	EZZ027	Symphyotrichum subulatum
E	ZZ027	EZZ027	Spiraea japonica
E	ZZ027	EZZ027	Zephyranthes candida
E	ZZ028	EZZ028	Prunus cerasifera cv. Atropurpurea
E	ZZ028	EZZ028	Prunus cerasifera cv. Atropurpurea
E	ZZ028	EZZ028	Prunus cerasifera cv. Atropurpurea
E	ZZ028	EZZ028	Prunus cerasifera cv. Atropurpurea
E	ZZ028	EZZ028	Prunus cerasifera cv. Atropurpurea
E	ZZ028	EZZ028	Prunus cerasifera cv. Atropurpurea
E	ZZ028	EZZ028	Cercis chinensis
E	ZZ028	EZZ028	Cercis chinensis
E	ZZ028	EZZ028	Cercis chinensis
E	ZZ028	EZZ028	Fraxinus chinensis
E	ZZ028	EZZ028	Fraxinus chinensis
E	ZZ028	EZZ028	Ligustrum japonicum
E	ZZ028	EZZ028	Cycas revoluta
E	ZZ028	EZZ028	Ligustrum sinense
E	ZZ028	EZZ028	Loropetalum chinense var. rubrum
E	ZZ028	EZZ028	Ligustrum ovalifolium
E	ZZ028	EZZ028	Forsythia suspensa
E	ZZ028	EZZ028	Rhododendron simsii
E	ZZ028	EZZ028	Buxus megistophylla
E	ZZ028	EZZ028	Photinia × fraseri
E	ZZ028	EZZ028	Rosa chinensis
E	ZZ028	EZZ028	Glandularia × hybrida
E	ZZ028	EZZ028	Petunia × hybrida
E	ZZ028	EZZ028	Tagetes erecta
E	ZZ028	EZZ028	Tradescantia pallida
E	ZZ028	EZZ028	Pelargonium hortorum
E	ZZ028	EZZ028	Dianthus gratianopolitanus
E	ZZ028	EZZ028	Digitaria sanguinalis
E	ZZ028	EZZ028	Hydrocotyle sibthorpioides
E	ZZ028	EZZ028	Stellaria media
E	ZZ028	EZZ028	Potentilla supina
E	ZZ028	EZZ028	Youngia japonica
E	ZZ028	EZZ028	Oxalis corymbosa
E	ZZ028	EZZ028	Zoysia japonica
E	ZZ028	EZZ028	Lolium multiflorum
E	ZZ192	EZZ192	Ginkgo biloba
E	ZZ192	EZZ192	Ginkgo biloba
E	ZZ192	EZZ192	Ginkgo biloba
E	ZZ192	EZZ192	Ginkgo biloba
E	ZZ192	EZZ192	Ginkgo biloba
E	ZZ192	EZZ192	Ginkgo biloba
E	ZZ192	EZZ192	Ginkgo biloba
E	ZZ192	EZZ192	Ginkgo biloba
E	ZZ192	EZZ192	Ginkgo biloba
E	ZZ192	EZZ192	Ginkgo biloba
E	ZZ192	EZZ192	Ginkgo biloba
E	ZZ192	EZZ192	Ginkgo biloba
E	ZZ192	EZZ192	Ginkgo biloba
E	ZZ192	EZZ192	Ginkgo biloba
E	ZZ192	EZZ192	Ginkgo biloba
E	ZZ192	EZZ192	Ginkgo biloba
E	ZZ192	EZZ192	Ginkgo biloba
E	ZZ192	EZZ192	Ginkgo biloba
E	ZZ192	EZZ192	Ginkgo biloba
E	ZZ192	EZZ192	Ginkgo biloba
E	ZZ192	EZZ192	Ginkgo biloba
E	ZZ192	EZZ192	Ginkgo biloba
E	ZZ192	EZZ192	Ginkgo biloba
E	ZZ192	EZZ192	Ginkgo biloba
E	ZZ192	EZZ192	Platanus acerifolia
E	ZZ192	EZZ192	Platanus acerifolia
E	ZZ192	EZZ192	Platanus acerifolia
E	ZZ192	EZZ192	Platanus acerifolia
E	ZZ192	EZZ192	Platanus acerifolia
E	ZZ192	EZZ192	Platanus acerifolia
E	ZZ192	EZZ192	Platanus acerifolia
E	ZZ192	EZZ192	Platanus acerifolia
E	ZZ192	EZZ192	Pittosporum tobira
E	ZZ192	EZZ192	Photinia × fraseri
E	ZZ192	EZZ192	Juniperus chinensis cv. Kaizuca
E	ZZ192	EZZ192	Prunus serrulata var. lannesiana
E	ZZ192	EZZ192	Photinia serratifolia
E	ZZ192	EZZ192	Prunus triloba
E	ZZ192	EZZ192	Ligustrum ovalifolium
E	ZZ192	EZZ192	Poa annua
E	ZZ192	EZZ192	Bromus catharticus
E	ZZ192	EZZ192	Erigeron canadensis
E	ZZ192	EZZ192	Zoysia japonica
E	ZZ192	EZZ192	Imperata cylindrica
E	ZZ192	EZZ192	Iris tectorum
E	ZZ202	EZZ202	Cercis chinensis
E	ZZ202	EZZ202	Cercis chinensis
E	ZZ202	EZZ202	Cercis chinensis
E	ZZ202	EZZ202	Cercis chinensis
E	ZZ202	EZZ202	Cercis chinensis
E	ZZ202	EZZ202	Cinnamomum septentrionale
E	ZZ202	EZZ202	Cinnamomum septentrionale
E	ZZ202	EZZ202	Cinnamomum septentrionale
E	ZZ202	EZZ202	Cinnamomum septentrionale
E	ZZ202	EZZ202	Cinnamomum septentrionale
E	ZZ202	EZZ202	Cinnamomum septentrionale
E	ZZ202	EZZ202	Platanus acerifolia
E	ZZ202	EZZ202	Platanus acerifolia
E	ZZ202	EZZ202	Platanus acerifolia
E	ZZ202	EZZ202	Platanus acerifolia
E	ZZ202	EZZ202	Platanus acerifolia
E	ZZ202	EZZ202	Platanus acerifolia
E	ZZ202	EZZ202	Platanus acerifolia
E	ZZ202	EZZ202	Platanus acerifolia
E	ZZ202	EZZ202	Platanus acerifolia
E	ZZ202	EZZ202	Rosa multiflora
E	ZZ202	EZZ202	Euonymus japonicus
E	ZZ202	EZZ202	Pittosporum tobira
E	ZZ202	EZZ202	Pyracantha fortuneana
E	ZZ202	EZZ202	Ophiopogon japonicus
E	ZZ202	EZZ202	Rubia cordifolia
E	ZZ202	EZZ202	Chenopodium album
E	ZZ202	EZZ202	Poa annua
E	ZZ202	EZZ202	Cynodon dactylon
E	ZZ202	EZZ202	Cirsium arvense var. integrifolium
E	ZZ202	EZZ202	Physalis peruviana
E	ZZ202	EZZ202	Sonchus oleraceus
E	ZZ202	EZZ202	Ixeris chinensis
E	ZZ245	EZZ245	Ginkgo biloba
E	ZZ245	EZZ245	Ginkgo biloba
E	ZZ245	EZZ245	Ginkgo biloba
E	ZZ245	EZZ245	Ginkgo biloba
E	ZZ245	EZZ245	Ginkgo biloba
E	ZZ245	EZZ245	Ginkgo biloba
E	ZZ245	EZZ245	Ginkgo biloba
E	ZZ245	EZZ245	Ligustrum japonicum
E	ZZ245	EZZ245	Ligustrum japonicum
E	ZZ245	EZZ245	Ligustrum japonicum
E	ZZ245	EZZ245	Ligustrum japonicum
E	ZZ245	EZZ245	Ligustrum japonicum
E	ZZ245	EZZ245	Ligustrum japonicum
E	ZZ245	EZZ245	Ligustrum japonicum
E	ZZ245	EZZ245	Ligustrum japonicum
E	ZZ245	EZZ245	Ligustrum japonicum
E	ZZ245	EZZ245	Ligustrum japonicum
E	ZZ245	EZZ245	Ligustrum japonicum
E	ZZ245	EZZ245	Ligustrum japonicum
E	ZZ245	EZZ245	Ligustrum japonicum
E	ZZ245	EZZ245	Ligustrum japonicum
E	ZZ245	EZZ245	Ligustrum japonicum
E	ZZ245	EZZ245	Ligustrum japonicum
E	ZZ245	EZZ245	Ligustrum japonicum
E	ZZ245	EZZ245	Ligustrum japonicum
E	ZZ245	EZZ245	Ligustrum japonicum
E	ZZ245	EZZ245	Ligustrum japonicum
E	ZZ245	EZZ245	Ligustrum japonicum
E	ZZ245	EZZ245	Pittosporum tobira
E	ZZ245	EZZ245	Buxus megistophylla
E	ZZ245	EZZ245	Ligustrum sinense
E	ZZ245	EZZ245	Weigela florida
E	ZZ245	EZZ245	Nandina domestica
E	ZZ245	EZZ245	Causonis japonica
E	ZZ245	EZZ245	Cynodon dactylon
E	ZZ245	EZZ245	Humulus scandens
E	ZZ245	EZZ245	Erigeron canadensis
E	ZZ245	EZZ245	Plantago asiatica
E	ZZ245	EZZ245	Euphorbia maculata
E	ZZ245	EZZ245	Ophiopogon bodinieri
E	ZZ245	EZZ245	Zephyranthes candida
E	ZZ245	EZZ245	Iris tectorum
E	ZZ245	EZZ245	Sonchus oleraceus
E	ZZ245	EZZ245	Ixeris polycephala
E	ZZ245	EZZ245	Oxalis corymbosa
E	ZZ245	EZZ245	Symphyotrichum subulatum
E	ZZ245	EZZ245	Solidago decurrens
E	ZZ245	EZZ245	Setaria viridis
E	ZZ245	EZZ245	Elephantopus scaber
E	ZZ245	EZZ245	Artemisia lavandulifolia
E	ZZ247	EZZ247	Acer buergerianum
E	ZZ247	EZZ247	Acer buergerianum
E	ZZ247	EZZ247	Acer buergerianum
E	ZZ247	EZZ247	Acer buergerianum
E	ZZ247	EZZ247	Acer buergerianum
E	ZZ247	EZZ247	Acer buergerianum
E	ZZ247	EZZ247	Acer buergerianum
E	ZZ247	EZZ247	Acer buergerianum
E	ZZ247	EZZ247	Acer buergerianum
E	ZZ247	EZZ247	Acer buergerianum
E	ZZ247	EZZ247	Pterocarya stenoptera
E	ZZ247	EZZ247	Pterocarya stenoptera
E	ZZ247	EZZ247	Pterocarya stenoptera
E	ZZ247	EZZ247	Pterocarya stenoptera
E	ZZ247	EZZ247	Pterocarya stenoptera
E	ZZ247	EZZ247	Pterocarya stenoptera
E	ZZ247	EZZ247	Pterocarya stenoptera
E	ZZ247	EZZ247	Pterocarya stenoptera
E	ZZ247	EZZ247	Pterocarya stenoptera
E	ZZ247	EZZ247	Eriobotrya japonica
E	ZZ247	EZZ247	Eriobotrya japonica
E	ZZ247	EZZ247	Eriobotrya japonica
E	ZZ247	EZZ247	Eriobotrya japonica
E	ZZ247	EZZ247	Eriobotrya japonica
E	ZZ247	EZZ247	Eriobotrya japonica
E	ZZ247	EZZ247	Eriobotrya japonica
E	ZZ247	EZZ247	Eriobotrya japonica
E	ZZ247	EZZ247	Eriobotrya japonica
E	ZZ247	EZZ247	Eriobotrya japonica
E	ZZ247	EZZ247	Eriobotrya japonica
E	ZZ247	EZZ247	Eriobotrya japonica
E	ZZ247	EZZ247	Prunus cerasifera cv. Atropurpurea
E	ZZ247	EZZ247	Prunus cerasifera cv. Atropurpurea
E	ZZ247	EZZ247	Prunus cerasifera cv. Atropurpurea
E	ZZ247	EZZ247	Prunus cerasifera cv. Atropurpurea
E	ZZ247	EZZ247	Prunus cerasifera cv. Atropurpurea
E	ZZ247	EZZ247	Prunus cerasifera cv. Atropurpurea
E	ZZ247	EZZ247	Prunus cerasifera cv. Atropurpurea
E	ZZ247	EZZ247	Prunus cerasifera cv. Atropurpurea
E	ZZ247	EZZ247	Prunus cerasifera cv. Atropurpurea
E	ZZ247	EZZ247	Prunus cerasifera cv. Atropurpurea
E	ZZ247	EZZ247	Prunus cerasifera cv. Atropurpurea
E	ZZ247	EZZ247	Prunus cerasifera cv. Atropurpurea
E	ZZ247	EZZ247	Prunus cerasifera cv. Atropurpurea
E	ZZ247	EZZ247	Prunus cerasifera cv. Atropurpurea
E	ZZ247	EZZ247	Prunus cerasifera cv. Atropurpurea
E	ZZ247	EZZ247	Platycladus orientalis
E	ZZ247	EZZ247	Platycladus orientalis
E	ZZ247	EZZ247	Platycladus orientalis
E	ZZ247	EZZ247	Platycladus orientalis
E	ZZ247	EZZ247	Platycladus orientalis
E	ZZ247	EZZ247	Platycladus orientalis
E	ZZ247	EZZ247	Platycladus orientalis
E	ZZ247	EZZ247	Platycladus orientalis
E	ZZ247	EZZ247	Photinia × fraseri
E	ZZ247	EZZ247	Pittosporum tobira
E	ZZ247	EZZ247	Cotoneaster horizontalis
E	ZZ247	EZZ247	Rosa chinensis
E	ZZ247	EZZ247	Spiraea japonica
E	ZZ247	EZZ247	Cynodon dactylon
E	ZZ247	EZZ247	Ophiopogon japonicus
E	ZZ247	EZZ247	Calystegia hederacea
E	ZZ247	EZZ247	Rubia cordifolia
E	ZZ247	EZZ247	Eleusine indica
E	ZZ247	EZZ247	Poa annua
E	ZZ247	EZZ247	Oxalis corymbosa
E	ZZ247	EZZ247	Plantago asiatica
E	ZZ247	EZZ247	Taraxacum mongolicum
E	ZZ247	EZZ247	Vicia sepium
E	ZZ247	EZZ247	Euphorbia maculata
E	ZZ247	EZZ247	Sonchus oleraceus
E	ZZ247	EZZ247	Veronica persica
E	ZZ251	EZZ251	Robinia pseudoacacia
E	ZZ251	EZZ251	Robinia pseudoacacia
E	ZZ251	EZZ251	Robinia pseudoacacia
E	ZZ251	EZZ251	Robinia pseudoacacia
E	ZZ251	EZZ251	Robinia pseudoacacia
E	ZZ251	EZZ251	Robinia pseudoacacia
E	ZZ251	EZZ251	Pinus tabuliformis
E	ZZ251	EZZ251	Pinus tabuliformis
E	ZZ251	EZZ251	Pinus tabuliformis
E	ZZ251	EZZ251	Pinus tabuliformis
E	ZZ251	EZZ251	Pinus tabuliformis
E	ZZ251	EZZ251	Pinus tabuliformis
E	ZZ251	EZZ251	Pinus tabuliformis
E	ZZ251	EZZ251	Pinus tabuliformis
E	ZZ251	EZZ251	Pinus tabuliformis
E	ZZ251	EZZ251	Pinus tabuliformis
E	ZZ251	EZZ251	Pinus tabuliformis
E	ZZ251	EZZ251	Pinus tabuliformis
E	ZZ251	EZZ251	Pinus tabuliformis
E	ZZ251	EZZ251	Pyrus bretschneideri
E	ZZ251	EZZ251	Pyrus bretschneideri
E	ZZ251	EZZ251	Pyrus bretschneideri
E	ZZ251	EZZ251	Yulania denudata cv. Dahua
E	ZZ251	EZZ251	Yulania denudata cv. Dahua
E	ZZ251	EZZ251	Yulania denudata cv. Dahua
E	ZZ251	EZZ251	Photinia serratifolia
E	ZZ251	EZZ251	Photinia serratifolia
E	ZZ251	EZZ251	Photinia serratifolia
E	ZZ251	EZZ251	Photinia serratifolia
E	ZZ251	EZZ251	Osmanthus fragrans cv. Chenghong Dangui
E	ZZ251	EZZ251	Osmanthus fragrans cv. Chenghong Dangui
E	ZZ251	EZZ251	Osmanthus fragrans cv. Chenghong Dangui
E	ZZ251	EZZ251	Euonymus japonicus
E	ZZ251	EZZ251	Buxus megistophylla
E	ZZ251	EZZ251	Setaria viridis
E	ZZ251	EZZ251	Oxalis corymbosa
E	ZZ251	EZZ251	Sonchus oleraceus
E	ZZ251	EZZ251	Chenopodium album
E	ZZ252	EZZ252	Magnolia grandiflora var. lanceolata
E	ZZ252	EZZ252	Magnolia grandiflora var. lanceolata
E	ZZ252	EZZ252	Magnolia grandiflora var. lanceolata
E	ZZ252	EZZ252	Magnolia grandiflora var. lanceolata
E	ZZ252	EZZ252	Magnolia grandiflora var. lanceolata
E	ZZ252	EZZ252	Magnolia grandiflora var. lanceolata
E	ZZ252	EZZ252	Ginkgo biloba
E	ZZ252	EZZ252	Ginkgo biloba
E	ZZ252	EZZ252	Ginkgo biloba
E	ZZ252	EZZ252	Ginkgo biloba
E	ZZ252	EZZ252	Ginkgo biloba
E	ZZ252	EZZ252	Ginkgo biloba
E	ZZ252	EZZ252	Ginkgo biloba
E	ZZ252	EZZ252	Ginkgo biloba
E	ZZ252	EZZ252	Ginkgo biloba
E	ZZ252	EZZ252	Ginkgo biloba
E	ZZ252	EZZ252	Rosa chinensis
E	ZZ252	EZZ252	Photinia × fraseri
E	ZZ252	EZZ252	Buxus megistophylla
E	ZZ252	EZZ252	Pseudosasa japonica
E	ZZ252	EZZ252	Cynodon dactylon
E	ZZ252	EZZ252	Artemisia lavandulifolia
E	ZZ252	EZZ252	Phyllostachys reticulata
E	ZZ252	EZZ252	Pleioblastus cv. Shanbian RuoZhu
E	ZZ252	EZZ252	Phyllostachys aureosulcata cv. Spectabilis
E	ZZ252	EZZ252	Phyllostachys aureosulcata
E	ZZ252	EZZ252	Phyllostachys propinqua
E	ZZ252	EZZ252	Ophiopogon japonicus
E	ZZ253	EZZ253	Eriobotrya japonica
E	ZZ253	EZZ253	Eriobotrya japonica
E	ZZ253	EZZ253	Eriobotrya japonica
E	ZZ253	EZZ253	Eriobotrya japonica
E	ZZ253	EZZ253	Eriobotrya japonica
E	ZZ253	EZZ253	Magnolia grandiflora var. lanceolata
E	ZZ253	EZZ253	Magnolia grandiflora var. lanceolata
E	ZZ253	EZZ253	Magnolia grandiflora var. lanceolata
E	ZZ253	EZZ253	Magnolia grandiflora var. lanceolata
E	ZZ253	EZZ253	Magnolia grandiflora var. lanceolata
E	ZZ253	EZZ253	Ligustrum japonicum
E	ZZ253	EZZ253	Ligustrum japonicum
E	ZZ253	EZZ253	Ligustrum japonicum
E	ZZ253	EZZ253	Ligustrum japonicum
E	ZZ253	EZZ253	Prunus × yedoensis
E	ZZ253	EZZ253	Prunus × yedoensis
E	ZZ253	EZZ253	Prunus × yedoensis
E	ZZ253	EZZ253	Prunus × yedoensis
E	ZZ253	EZZ253	Prunus × yedoensis
E	ZZ253	EZZ253	Prunus × yedoensis
E	ZZ253	EZZ253	Prunus × yedoensis
E	ZZ253	EZZ253	Prunus × yedoensis
E	ZZ253	EZZ253	Prunus × yedoensis
E	ZZ253	EZZ253	Prunus × yedoensis
E	ZZ253	EZZ253	Prunus × yedoensis
E	ZZ253	EZZ253	Prunus × yedoensis
E	ZZ253	EZZ253	Prunus × yedoensis
E	ZZ253	EZZ253	Prunus × yedoensis
E	ZZ253	EZZ253	Prunus × yedoensis
E	ZZ253	EZZ253	Prunus × yedoensis
E	ZZ253	EZZ253	Prunus × yedoensis
E	ZZ253	EZZ253	Prunus × yedoensis
E	ZZ253	EZZ253	Prunus × yedoensis
E	ZZ253	EZZ253	Prunus × yedoensis
E	ZZ253	EZZ253	Prunus × yedoensis
E	ZZ253	EZZ253	Prunus × yedoensis
E	ZZ253	EZZ253	Prunus × yedoensis
E	ZZ253	EZZ253	Prunus × yedoensis
E	ZZ253	EZZ253	Prunus × yedoensis
E	ZZ253	EZZ253	Ligustrum quihoui
E	ZZ253	EZZ253	Euonymus japonicus
E	ZZ253	EZZ253	Photinia × fraseri
E	ZZ253	EZZ253	Juniperus chinensis cv. Kaizuca
E	ZZ253	EZZ253	Cynodon dactylon
E	ZZ253	EZZ253	Poa annua
E	ZZ253	EZZ253	Lolium perenne
E	ZZ253	EZZ253	Ophiopogon japonicus
E	ZZ253	EZZ253	Iris tectorum
E	ZZ253	EZZ253	Euphorbia maculata
E	ZZ253	EZZ253	Oxalis corymbosa
E	ZZ253	EZZ253	Amaranthus blitum
E	ZZ253	EZZ253	Digitaria sanguinalis
E	ZZ253	EZZ253	Panicum repens
E	ZZ253	EZZ253	Hemerocallis fulva
E	ZZ253	EZZ253	Phyllostachys propinqua
E	ZZ254	EZZ254	Eucommia ulmoides
E	ZZ254	EZZ254	Eucommia ulmoides
E	ZZ254	EZZ254	Eucommia ulmoides
E	ZZ254	EZZ254	Eucommia ulmoides
E	ZZ254	EZZ254	Eucommia ulmoides
E	ZZ254	EZZ254	Eucommia ulmoides
E	ZZ254	EZZ254	Eucommia ulmoides
E	ZZ254	EZZ254	Eucommia ulmoides
E	ZZ254	EZZ254	Eucommia ulmoides
E	ZZ254	EZZ254	Eucommia ulmoides
E	ZZ254	EZZ254	Magnolia grandiflora var. lanceolata
E	ZZ254	EZZ254	Magnolia grandiflora var. lanceolata
E	ZZ254	EZZ254	Magnolia grandiflora var. lanceolata
E	ZZ254	EZZ254	Cedrus deodara
E	ZZ254	EZZ254	Cedrus deodara
E	ZZ254	EZZ254	Cedrus deodara
E	ZZ254	EZZ254	Cedrus deodara
E	ZZ254	EZZ254	Cedrus deodara
E	ZZ254	EZZ254	Ligustrum japonicum
E	ZZ254	EZZ254	Ligustrum japonicum
E	ZZ254	EZZ254	Ligustrum japonicum
E	ZZ254	EZZ254	Ligustrum japonicum
E	ZZ254	EZZ254	Ligustrum japonicum
E	ZZ254	EZZ254	Ligustrum japonicum
E	ZZ254	EZZ254	Ligustrum japonicum
E	ZZ254	EZZ254	Ligustrum japonicum
E	ZZ254	EZZ254	Ligustrum japonicum
E	ZZ254	EZZ254	Ligustrum japonicum
E	ZZ254	EZZ254	Ligustrum ovalifolium
E	ZZ254	EZZ254	Malus × micromalus
E	ZZ254	EZZ254	Pittosporum tobira
E	ZZ254	EZZ254	Cornus sericea
E	ZZ254	EZZ254	Petunia × hybrida
E	ZZ254	EZZ254	Rudbeckia fulgida
E	ZZ254	EZZ254	Erigeron canadensis
E	ZZ254	EZZ254	Poa annua
E	ZZ254	EZZ254	Zoysia japonica
E	ZZ254	EZZ254	Lolium perenne
E	ZZ254	EZZ254	Stellaria media
E	ZZ254	EZZ254	Chenopodium album
E	ZZ254	EZZ254	Erigeron bonariensis
E	ZZ254	EZZ254	Vincetoxicum chinense
E	ZZ254	EZZ254	Oxalis corymbosa
E	ZZ254	EZZ254	Sonchus oleraceus
E	ZZ254	EZZ254	Potentilla supina
E	ZZ254	EZZ254	Rorippa indica
E	ZZ254	EZZ254	Setaria viridis
E	ZZ254	EZZ254	Amaranthus blitum
E	ZZ256	EZZ256	Pterocarya stenoptera
E	ZZ256	EZZ256	Pterocarya stenoptera
E	ZZ256	EZZ256	Pterocarya stenoptera
E	ZZ256	EZZ256	Pterocarya stenoptera
E	ZZ256	EZZ256	Pterocarya stenoptera
E	ZZ256	EZZ256	Pterocarya stenoptera
E	ZZ256	EZZ256	Pterocarya stenoptera
E	ZZ256	EZZ256	Pterocarya stenoptera
E	ZZ256	EZZ256	Pterocarya stenoptera
E	ZZ256	EZZ256	Ligustrum japonicum
E	ZZ256	EZZ256	Ligustrum japonicum
E	ZZ256	EZZ256	Ligustrum japonicum
E	ZZ256	EZZ256	Ligustrum japonicum
E	ZZ256	EZZ256	Ligustrum japonicum
E	ZZ256	EZZ256	Ligustrum japonicum
E	ZZ256	EZZ256	Ligustrum japonicum
E	ZZ256	EZZ256	Prunus cerasifera cv. Atropurpurea
E	ZZ256	EZZ256	Prunus cerasifera cv. Atropurpurea
E	ZZ256	EZZ256	Ailanthus altissima
E	ZZ256	EZZ256	Ailanthus altissima
E	ZZ256	EZZ256	Ginkgo biloba
E	ZZ256	EZZ256	Ginkgo biloba
E	ZZ256	EZZ256	Populus tomentosa
E	ZZ256	EZZ256	Populus tomentosa
E	ZZ256	EZZ256	Staphylea forrestii
E	ZZ256	EZZ256	Magnolia grandiflora var. lanceolata
E	ZZ256	EZZ256	Magnolia grandiflora var. lanceolata
E	ZZ256	EZZ256	Fatsia japonica
E	ZZ256	EZZ256	Rosa multiflora
E	ZZ256	EZZ256	Cercis chinensis
E	ZZ256	EZZ256	Photinia × fraseri
E	ZZ256	EZZ256	Oxalis corymbosa
E	ZZ256	EZZ256	Ophiopogon japonicus
E	ZZ256	EZZ256	Erigeron canadensis
E	ZZ256	EZZ256	Sonchus oleraceus
E	ZZ256	EZZ256	Rubia cordifolia
E	ZZ256	EZZ256	Coreopsis basalis
E	ZZ256	EZZ256	Dianthus chinensis
E	ZZ256	EZZ256	Sedum lineare
E	ZZ256	EZZ256	Poa annua
E	ZZ256	EZZ256	Cirsium arvense var. integrifolium
E	ZZ256	EZZ256	Humulus scandens
E	ZZ256	EZZ256	Zephyranthes candida
E	ZZ256	EZZ256	Chenopodium album
E	ZZ256	EZZ256	Bromus japonicus
E	ZZ257	EZZ257	Eriobotrya japonica
E	ZZ257	EZZ257	Eriobotrya japonica
E	ZZ257	EZZ257	Eriobotrya japonica
E	ZZ257	EZZ257	Eriobotrya japonica
E	ZZ257	EZZ257	Eriobotrya japonica
E	ZZ257	EZZ257	Eriobotrya japonica
E	ZZ257	EZZ257	Cedrus deodara
E	ZZ257	EZZ257	Cedrus deodara
E	ZZ257	EZZ257	Cedrus deodara
E	ZZ257	EZZ257	Cedrus deodara
E	ZZ257	EZZ257	Cedrus deodara
E	ZZ257	EZZ257	Magnolia grandiflora var. lanceolata
E	ZZ257	EZZ257	Magnolia grandiflora var. lanceolata
E	ZZ257	EZZ257	Magnolia grandiflora var. lanceolata
E	ZZ257	EZZ257	Magnolia grandiflora var. lanceolata
E	ZZ257	EZZ257	Magnolia grandiflora var. lanceolata
E	ZZ257	EZZ257	Magnolia grandiflora var. lanceolata
E	ZZ257	EZZ257	Magnolia grandiflora var. lanceolata
E	ZZ257	EZZ257	Magnolia grandiflora var. lanceolata
E	ZZ257	EZZ257	Magnolia grandiflora var. lanceolata
E	ZZ257	EZZ257	Magnolia grandiflora var. lanceolata
E	ZZ257	EZZ257	Sorbus pohuashanensis
E	ZZ257	EZZ257	Ailanthus altissima
E	ZZ257	EZZ257	Ailanthus altissima
E	ZZ257	EZZ257	Ailanthus altissima
E	ZZ257	EZZ257	Ailanthus altissima
E	ZZ257	EZZ257	Ailanthus altissima
E	ZZ257	EZZ257	Cotinus coggygria var. cinereus
E	ZZ257	EZZ257	Cotinus coggygria var. cinereus
E	ZZ257	EZZ257	Robinia pseudoacacia
E	ZZ257	EZZ257	Photinia × fraseri
E	ZZ257	EZZ257	Nandina domestica
E	ZZ257	EZZ257	Ligustrum quihoui
E	ZZ257	EZZ257	Kerria japonica
E	ZZ257	EZZ257	Platycladus orientalis cv. Aurea
E	ZZ257	EZZ257	Iris tectorum
E	ZZ257	EZZ257	Oxalis corymbosa
E	ZZ257	EZZ257	Ophiopogon japonicus
E	ZZ257	EZZ257	Trifolium repens
E	ZZ257	EZZ257	Euphorbia maculata
E	ZZ257	EZZ257	Setaria viridis
E	ZZ257	EZZ257	Cirsium arvense var. integrifolium
E	ZZ257	EZZ257	Alcea rosea
E	ZZ257	EZZ257	Cynodon dactylon
E	ZZ257	EZZ257	Chenopodium album
E	ZZ257	EZZ257	Vicia sepium
E	ZZ257	EZZ257	Elephantopus scaber
E	ZZ257	EZZ257	Plantago asiatica
E	ZZ257	EZZ257	Poa annua
E	ZZ257	EZZ257	Artemisia selengensis
E	ZZ258	EZZ258	Magnolia grandiflora var. lanceolata
E	ZZ258	EZZ258	Magnolia grandiflora var. lanceolata
E	ZZ258	EZZ258	Magnolia grandiflora var. lanceolata
E	ZZ258	EZZ258	Magnolia grandiflora var. lanceolata
E	ZZ258	EZZ258	Magnolia grandiflora var. lanceolata
E	ZZ258	EZZ258	Magnolia grandiflora var. lanceolata
E	ZZ258	EZZ258	Magnolia grandiflora var. lanceolata
E	ZZ258	EZZ258	Magnolia grandiflora var. lanceolata
E	ZZ258	EZZ258	Robinia pseudoacacia
E	ZZ258	EZZ258	Robinia pseudoacacia
E	ZZ258	EZZ258	Robinia pseudoacacia
E	ZZ258	EZZ258	Robinia pseudoacacia
E	ZZ258	EZZ258	Robinia pseudoacacia
E	ZZ258	EZZ258	Robinia pseudoacacia
E	ZZ258	EZZ258	Robinia pseudoacacia
E	ZZ258	EZZ258	Robinia pseudoacacia
E	ZZ258	EZZ258	Robinia pseudoacacia
E	ZZ258	EZZ258	Robinia pseudoacacia
E	ZZ258	EZZ258	Robinia pseudoacacia
E	ZZ258	EZZ258	Robinia pseudoacacia
E	ZZ258	EZZ258	Robinia pseudoacacia
E	ZZ258	EZZ258	Robinia pseudoacacia
E	ZZ258	EZZ258	Populus tomentosa
E	ZZ258	EZZ258	Populus tomentosa
E	ZZ258	EZZ258	Populus tomentosa
E	ZZ258	EZZ258	Populus tomentosa
E	ZZ258	EZZ258	Populus tomentosa
E	ZZ258	EZZ258	Populus tomentosa
E	ZZ258	EZZ258	Populus tomentosa
E	ZZ258	EZZ258	Spiraea japonica
E	ZZ258	EZZ258	Cornus alba
E	ZZ258	EZZ258	Trifolium repens
E	ZZ258	EZZ258	Fragaria vesca
E	ZZ258	EZZ258	Oxalis corymbosa
E	ZZ258	EZZ258	Ophiopogon japonicus
E	ZZ258	EZZ258	Setaria viridis
E	ZZ258	EZZ258	Chenopodium album
E	ZZ258	EZZ258	Iris tectorum
E	ZZ258	EZZ258	Cynodon dactylon
E	ZZ258	EZZ258	Erigeron canadensis
E	ZZ258	EZZ258	Poa annua
E	ZZ258	EZZ258	Causonis japonica
E	ZZ258	EZZ258	Cuscuta chinensis
E	ZZ258	EZZ258	Rubia cordifolia
E	ZZ258	EZZ258	Elephantopus scaber
E	ZZ259	EZZ259	Yulania denudata cv. Dahua
E	ZZ259	EZZ259	Yulania denudata cv. Dahua
E	ZZ259	EZZ259	Yulania denudata cv. Dahua
E	ZZ259	EZZ259	Yulania denudata cv. Dahua
E	ZZ259	EZZ259	Yulania denudata cv. Dahua
E	ZZ259	EZZ259	Yulania denudata cv. Dahua
E	ZZ259	EZZ259	Yulania denudata cv. Dahua
E	ZZ259	EZZ259	Yulania denudata cv. Dahua
E	ZZ259	EZZ259	Yulania denudata cv. Dahua
E	ZZ259	EZZ259	Yulania denudata cv. Dahua
E	ZZ259	EZZ259	Yulania denudata cv. Dahua
E	ZZ259	EZZ259	Yulania denudata cv. Dahua
E	ZZ259	EZZ259	Yulania denudata cv. Dahua
E	ZZ259	EZZ259	Yulania denudata cv. Dahua
E	ZZ259	EZZ259	Yulania denudata cv. Dahua
E	ZZ259	EZZ259	Yulania denudata cv. Dahua
E	ZZ259	EZZ259	Yulania denudata cv. Dahua
E	ZZ259	EZZ259	Yulania denudata cv. Dahua
E	ZZ259	EZZ259	Firmiana simplex
E	ZZ259	EZZ259	Firmiana simplex
E	ZZ259	EZZ259	Firmiana simplex
E	ZZ259	EZZ259	Firmiana simplex
E	ZZ259	EZZ259	Firmiana simplex
E	ZZ259	EZZ259	Firmiana simplex
E	ZZ259	EZZ259	Juniperus chinensis cv. Kaizuca
E	ZZ259	EZZ259	Juniperus chinensis cv. Kaizuca
E	ZZ259	EZZ259	Juniperus chinensis cv. Kaizuca
E	ZZ259	EZZ259	Robinia pseudoacacia
E	ZZ259	EZZ259	Robinia pseudoacacia
E	ZZ259	EZZ259	Robinia pseudoacacia
E	ZZ259	EZZ259	Robinia pseudoacacia
E	ZZ259	EZZ259	Robinia pseudoacacia
E	ZZ259	EZZ259	Robinia pseudoacacia
E	ZZ259	EZZ259	Robinia pseudoacacia
E	ZZ259	EZZ259	Ailanthus altissima
E	ZZ259	EZZ259	Ailanthus altissima
E	ZZ259	EZZ259	Euonymus japonicus
E	ZZ259	EZZ259	Prunus triloba
E	ZZ259	EZZ259	Nandina domestica
E	ZZ259	EZZ259	Pittosporum tobira
E	ZZ259	EZZ259	Iris tectorum
E	ZZ259	EZZ259	Ophiopogon japonicus
E	ZZ259	EZZ259	Yucca filamentosa
E	ZZ259	EZZ259	Cynodon dactylon
E	ZZ259	EZZ259	Oxalis corymbosa
E	ZZ259	EZZ259	Setaria viridis
E	ZZ259	EZZ259	Amaranthus blitum
E	ZZ259	EZZ259	Plantago asiatica
E	ZZ259	EZZ259	Chenopodium album
E	ZZ259	EZZ259	Digitaria sanguinalis
E	ZZ259	EZZ259	Humulus scandens
E	ZZ259	EZZ259	Erigeron canadensis
E	ZZ259	EZZ259	Ixeris chinensis
E	ZZ259	EZZ259	Poa annua
E	ZZ259	EZZ259	Duchesnea indica
E	ZZ260	EZZ260	Robinia pseudoacacia
E	ZZ260	EZZ260	Robinia pseudoacacia
E	ZZ260	EZZ260	Robinia pseudoacacia
E	ZZ260	EZZ260	Robinia pseudoacacia
E	ZZ260	EZZ260	Robinia pseudoacacia
E	ZZ260	EZZ260	Robinia pseudoacacia
E	ZZ260	EZZ260	Robinia pseudoacacia
E	ZZ260	EZZ260	Prunus persica cv. Duplex
E	ZZ260	EZZ260	Prunus persica cv. Duplex
E	ZZ260	EZZ260	Prunus persica cv. Duplex
E	ZZ260	EZZ260	Prunus persica cv. Duplex
E	ZZ260	EZZ260	Prunus persica cv. Duplex
E	ZZ260	EZZ260	Prunus persica cv. Duplex
E	ZZ260	EZZ260	Prunus persica cv. Duplex
E	ZZ260	EZZ260	Prunus persica cv. Duplex
E	ZZ260	EZZ260	Prunus persica cv. Duplex
E	ZZ260	EZZ260	Prunus persica cv. Duplex
E	ZZ260	EZZ260	Prunus persica cv. Duplex
E	ZZ260	EZZ260	Prunus persica cv. Duplex
E	ZZ260	EZZ260	Prunus persica cv. Duplex
E	ZZ260	EZZ260	Pinus bungeana
E	ZZ260	EZZ260	Pinus bungeana
E	ZZ260	EZZ260	Pinus bungeana
E	ZZ260	EZZ260	Pinus bungeana
E	ZZ260	EZZ260	Pinus bungeana
E	ZZ260	EZZ260	Syringa meyeri
E	ZZ260	EZZ260	Syringa meyeri
E	ZZ260	EZZ260	Syringa meyeri
E	ZZ260	EZZ260	Syringa meyeri
E	ZZ260	EZZ260	Syringa meyeri
E	ZZ260	EZZ260	Syringa meyeri
E	ZZ260	EZZ260	Syringa meyeri
E	ZZ260	EZZ260	Syringa meyeri
E	ZZ260	EZZ260	Syringa meyeri
E	ZZ260	EZZ260	Syringa meyeri
E	ZZ260	EZZ260	Photinia × fraseri
E	ZZ260	EZZ260	Pittosporum tobira
E	ZZ260	EZZ260	Nandina domestica
E	ZZ260	EZZ260	Iris tectorum
E	ZZ260	EZZ260	Liriope spicata
E	ZZ260	EZZ260	Erigeron canadensis
E	ZZ260	EZZ260	Rubia cordifolia
E	ZZ260	EZZ260	Humulus scandens
E	ZZ260	EZZ260	Ixeris chinensis
E	ZZ260	EZZ260	Sonchus oleraceus
E	ZZ260	EZZ260	Plantago asiatica
E	ZZ260	EZZ260	Euphorbia maculata
E	ZZ260	EZZ260	Amaranthus blitum
E	ZZ260	EZZ260	Poa annua
E	ZZ260	EZZ260	Cynodon dactylon
E	ZZ260	EZZ260	Setaria viridis
E	ZZ260	EZZ260	Oxalis corymbosa
E	ZZ260	EZZ260	Trifolium repens
E	ZZ260	EZZ260	Causonis japonica
E	ZZ260	EZZ260	Calystegia hederacea
E	ZZ261	EZZ261	Magnolia grandiflora var. lanceolata
E	ZZ261	EZZ261	Magnolia grandiflora var. lanceolata
E	ZZ261	EZZ261	Magnolia grandiflora var. lanceolata
E	ZZ261	EZZ261	Magnolia grandiflora var. lanceolata
E	ZZ261	EZZ261	Magnolia grandiflora var. lanceolata
E	ZZ261	EZZ261	Magnolia grandiflora var. lanceolata
E	ZZ261	EZZ261	Magnolia grandiflora var. lanceolata
E	ZZ261	EZZ261	Magnolia grandiflora var. lanceolata
E	ZZ261	EZZ261	Fraxinus chinensis
E	ZZ261	EZZ261	Fraxinus chinensis
E	ZZ261	EZZ261	Fraxinus chinensis
E	ZZ261	EZZ261	Fraxinus chinensis
E	ZZ261	EZZ261	Fraxinus chinensis
E	ZZ261	EZZ261	Prunus × yedoensis
E	ZZ261	EZZ261	Prunus × yedoensis
E	ZZ261	EZZ261	Prunus × yedoensis
E	ZZ261	EZZ261	Prunus × yedoensis
E	ZZ261	EZZ261	Prunus × yedoensis
E	ZZ261	EZZ261	Prunus × yedoensis
E	ZZ261	EZZ261	Ligustrum japonicum
E	ZZ261	EZZ261	Ligustrum japonicum
E	ZZ261	EZZ261	Ligustrum japonicum
E	ZZ261	EZZ261	Ligustrum japonicum
E	ZZ261	EZZ261	Juniperus formosana
E	ZZ261	EZZ261	Juniperus formosana
E	ZZ261	EZZ261	Juniperus formosana
E	ZZ261	EZZ261	Juniperus formosana
E	ZZ261	EZZ261	Juniperus formosana
E	ZZ261	EZZ261	Styphnolobium japonicum
E	ZZ261	EZZ261	Styphnolobium japonicum
E	ZZ261	EZZ261	Liriodendron chinense
E	ZZ261	EZZ261	Ligustrum japonicum cv. Howardii
E	ZZ261	EZZ261	Ligustrum ovalifolium
E	ZZ261	EZZ261	Nandina domestica
E	ZZ261	EZZ261	Forsythia viridissima
E	ZZ261	EZZ261	Weigela florida
E	ZZ261	EZZ261	Iris tectorum
E	ZZ261	EZZ261	Setaria viridis
E	ZZ261	EZZ261	Erigeron canadensis
E	ZZ261	EZZ261	Causonis japonica
E	ZZ261	EZZ261	Ophiopogon japonicus
E	ZZ261	EZZ261	Artemisia selengensis
E	ZZ261	EZZ261	Veronica persica
E	ZZ261	EZZ261	Digitaria sanguinalis
E	ZZ261	EZZ261	Euphorbia maculata
E	ZZ261	EZZ261	Sonchus oleraceus
E	ZZ261	EZZ261	Poa annua
E	ZZ261	EZZ261	Zehneria japonica
E	ZZ261	EZZ261	Cirsium arvense var. integrifolium
E	ZZ261	EZZ261	Oxalis corymbosa
E	ZZ261	EZZ261	Sonchus oleraceus
E	ZZ261	EZZ261	Portulaca oleracea
E	ZZ261	EZZ261	Galium spurium
E	ZZ261	EZZ261	Paspalum thunbergii
E	ZZ261	EZZ261	Taraxacum mongolicum
E	ZZ262	EZZ262	Malus spectabilis
E	ZZ262	EZZ262	Malus spectabilis
E	ZZ262	EZZ262	Malus spectabilis
E	ZZ262	EZZ262	Malus spectabilis
E	ZZ262	EZZ262	Malus spectabilis
E	ZZ262	EZZ262	Malus spectabilis
E	ZZ262	EZZ262	Malus spectabilis
E	ZZ262	EZZ262	Malus spectabilis
E	ZZ262	EZZ262	Malus spectabilis
E	ZZ262	EZZ262	Malus spectabilis
E	ZZ262	EZZ262	Malus spectabilis
E	ZZ262	EZZ262	Malus spectabilis
E	ZZ262	EZZ262	Malus spectabilis
E	ZZ262	EZZ262	Malus spectabilis
E	ZZ262	EZZ262	Malus spectabilis
E	ZZ262	EZZ262	Malus spectabilis
E	ZZ262	EZZ262	Malus spectabilis
E	ZZ262	EZZ262	Malus spectabilis
E	ZZ262	EZZ262	Malus spectabilis
E	ZZ262	EZZ262	Malus spectabilis
E	ZZ262	EZZ262	Malus spectabilis
E	ZZ262	EZZ262	Malus spectabilis
E	ZZ262	EZZ262	Malus spectabilis
E	ZZ262	EZZ262	Malus spectabilis
E	ZZ262	EZZ262	Cinnamomum septentrionale
E	ZZ262	EZZ262	Cinnamomum septentrionale
E	ZZ262	EZZ262	Cinnamomum septentrionale
E	ZZ262	EZZ262	Cinnamomum septentrionale
E	ZZ262	EZZ262	Cinnamomum septentrionale
E	ZZ262	EZZ262	Cinnamomum septentrionale
E	ZZ262	EZZ262	Cinnamomum septentrionale
E	ZZ262	EZZ262	Cinnamomum septentrionale
E	ZZ262	EZZ262	Ginkgo biloba
E	ZZ262	EZZ262	Ginkgo biloba
E	ZZ262	EZZ262	Ginkgo biloba
E	ZZ262	EZZ262	Ginkgo biloba
E	ZZ262	EZZ262	Pittosporum tobira
E	ZZ262	EZZ262	Buxus sinica var. parvifolia
E	ZZ262	EZZ262	Berberis thunbergii cv. Atropurpurea
E	ZZ262	EZZ262	Ligustrum japonicum cv. Howardii
E	ZZ262	EZZ262	Gardenia jasminoides
E	ZZ262	EZZ262	Cynodon dactylon
E	ZZ262	EZZ262	Euphorbia maculata
E	ZZ262	EZZ262	Chenopodium album
E	ZZ262	EZZ262	Erigeron canadensis
E	ZZ262	EZZ262	Oxalis corymbosa
E	ZZ262	EZZ262	Taraxacum mongolicum
E	ZZ262	EZZ262	Rumex dentatus
E	ZZ262	EZZ262	Veronica persica
E	ZZ263	EZZ263	Cedrus deodara
E	ZZ263	EZZ263	Cedrus deodara
E	ZZ263	EZZ263	Cedrus deodara
E	ZZ263	EZZ263	Cedrus deodara
E	ZZ263	EZZ263	Fraxinus chinensis
E	ZZ263	EZZ263	Fraxinus chinensis
E	ZZ263	EZZ263	Fraxinus chinensis
E	ZZ263	EZZ263	Fraxinus chinensis
E	ZZ263	EZZ263	Fraxinus chinensis
E	ZZ263	EZZ263	Fraxinus chinensis
E	ZZ263	EZZ263	Fraxinus chinensis
E	ZZ263	EZZ263	Juniperus formosana
E	ZZ263	EZZ263	Juniperus formosana
E	ZZ263	EZZ263	Juniperus formosana
E	ZZ263	EZZ263	Juniperus formosana
E	ZZ263	EZZ263	Ginkgo biloba
E	ZZ263	EZZ263	Ginkgo biloba
E	ZZ263	EZZ263	Ginkgo biloba
E	ZZ263	EZZ263	Platanus acerifolia
E	ZZ263	EZZ263	Cinnamomum septentrionale
E	ZZ263	EZZ263	Cinnamomum septentrionale
E	ZZ263	EZZ263	Cinnamomum septentrionale
E	ZZ263	EZZ263	Cinnamomum septentrionale
E	ZZ263	EZZ263	Cinnamomum septentrionale
E	ZZ263	EZZ263	Cinnamomum septentrionale
E	ZZ263	EZZ263	Rosa chinensis
E	ZZ263	EZZ263	Juniperus chinensis
E	ZZ263	EZZ263	Euonymus japonicus
E	ZZ263	EZZ263	Ligustrum japonicum cv. Howardii
E	ZZ263	EZZ263	Pyracantha fortuneana
E	ZZ263	EZZ263	Iris tectorum
E	ZZ263	EZZ263	Rudbeckia hirta
E	ZZ263	EZZ263	Poa annua
E	ZZ263	EZZ263	Eragrostis pilosa
E	ZZ263	EZZ263	Cynodon dactylon
E	ZZ263	EZZ263	Digitaria sanguinalis
E	ZZ263	EZZ263	Portulaca oleracea
E	ZZ263	EZZ263	Chenopodium album
E	ZZ263	EZZ263	Amaranthus blitum
E	ZZ263	EZZ263	Setaria viridis
E	ZZ263	EZZ263	Potentilla supina
E	ZZ263	EZZ263	Euphorbia maculata
E	ZZ263	EZZ263	Ixeris chinensis
E	ZZ263	EZZ263	Rumex dentatus
E	ZZ263	EZZ263	Sonchus oleraceus
E	ZZ263	EZZ263	Ophiopogon japonicus
E	ZZ263	EZZ263	Zephyranthes candida
E	ZZ264	EZZ264	Robinia pseudoacacia
E	ZZ264	EZZ264	Robinia pseudoacacia
E	ZZ264	EZZ264	Robinia pseudoacacia
E	ZZ264	EZZ264	Robinia pseudoacacia
E	ZZ264	EZZ264	Robinia pseudoacacia
E	ZZ264	EZZ264	Robinia pseudoacacia
E	ZZ264	EZZ264	Magnolia grandiflora var. lanceolata
E	ZZ264	EZZ264	Magnolia grandiflora var. lanceolata
E	ZZ264	EZZ264	Magnolia grandiflora var. lanceolata
E	ZZ264	EZZ264	Magnolia grandiflora var. lanceolata
E	ZZ264	EZZ264	Platanus acerifolia
E	ZZ264	EZZ264	Platanus acerifolia
E	ZZ264	EZZ264	Platanus acerifolia
E	ZZ264	EZZ264	Cinnamomum septentrionale
E	ZZ264	EZZ264	Cinnamomum septentrionale
E	ZZ264	EZZ264	Malus pumila
E	ZZ264	EZZ264	Malus pumila
E	ZZ264	EZZ264	Malus pumila
E	ZZ264	EZZ264	Malus pumila
E	ZZ264	EZZ264	Buxus megistophylla
E	ZZ264	EZZ264	Photinia × fraseri
E	ZZ264	EZZ264	Pittosporum tobira
E	ZZ264	EZZ264	Gynostemma pentaphyllum
E	ZZ264	EZZ264	Pleioblastus viridistriatus
E	ZZ264	EZZ264	Cynodon dactylon
E	ZZ264	EZZ264	Ophiopogon japonicus
E	ZZ264	EZZ264	Chenopodium album
E	ZZ264	EZZ264	Amaranthus blitum
E	ZZ264	EZZ264	Petunia × hybrida
E	ZZ264	EZZ264	Panicum repens
E	ZZ265	EZZ265	Firmiana simplex
E	ZZ265	EZZ265	Firmiana simplex
E	ZZ265	EZZ265	Firmiana simplex
E	ZZ265	EZZ265	Firmiana simplex
E	ZZ265	EZZ265	Firmiana simplex
E	ZZ265	EZZ265	Acer miyabei
E	ZZ265	EZZ265	Prunus cerasifera cv. Atropurpurea
E	ZZ265	EZZ265	Prunus cerasifera cv. Atropurpurea
E	ZZ265	EZZ265	Prunus cerasifera cv. Atropurpurea
E	ZZ265	EZZ265	Prunus cerasifera cv. Atropurpurea
E	ZZ265	EZZ265	Prunus cerasifera cv. Atropurpurea
E	ZZ265	EZZ265	Robinia pseudoacacia
E	ZZ265	EZZ265	Robinia pseudoacacia
E	ZZ265	EZZ265	Robinia pseudoacacia
E	ZZ265	EZZ265	Robinia pseudoacacia
E	ZZ265	EZZ265	Robinia pseudoacacia
E	ZZ265	EZZ265	Robinia pseudoacacia
E	ZZ265	EZZ265	Ligustrum japonicum
E	ZZ265	EZZ265	Ligustrum japonicum
E	ZZ265	EZZ265	Ligustrum japonicum
E	ZZ265	EZZ265	Ligustrum japonicum
E	ZZ265	EZZ265	Ligustrum japonicum
E	ZZ265	EZZ265	Eriobotrya japonica
E	ZZ265	EZZ265	Punica granatum
E	ZZ265	EZZ265	Punica granatum
E	ZZ265	EZZ265	Punica granatum
E	ZZ265	EZZ265	Punica granatum
E	ZZ265	EZZ265	Punica granatum
E	ZZ265	EZZ265	Punica granatum
E	ZZ265	EZZ265	Juniperus chinensis cv. Kaizuca
E	ZZ265	EZZ265	Berberis thunbergii cv. Atropurpurea
E	ZZ265	EZZ265	Punica granatum
E	ZZ265	EZZ265	Rosa multiflora
E	ZZ265	EZZ265	Trifolium repens
E	ZZ265	EZZ265	Oxalis corymbosa
E	ZZ265	EZZ265	Ophiopogon bodinieri
E	ZZ265	EZZ265	Liriope spicata
E	ZZ265	EZZ265	Coreopsis basalis
E	ZZ265	EZZ265	Erigeron canadensis
E	ZZ265	EZZ265	Euphorbia maculata
E	ZZ265	EZZ265	Poa annua
E	ZZ265	EZZ265	Cynodon dactylon
E	ZZ266	EZZ266	Cercis chinensis
E	ZZ266	EZZ266	Cercis chinensis
E	ZZ266	EZZ266	Ginkgo biloba
E	ZZ266	EZZ266	Ginkgo biloba
E	ZZ266	EZZ266	Ginkgo biloba
E	ZZ266	EZZ266	Ginkgo biloba
E	ZZ266	EZZ266	Ginkgo biloba
E	ZZ266	EZZ266	Prunus persica cv. Duplex
E	ZZ266	EZZ266	Prunus persica cv. Duplex
E	ZZ266	EZZ266	Prunus persica cv. Duplex
E	ZZ266	EZZ266	Ligustrum japonicum
E	ZZ266	EZZ266	Ligustrum japonicum
E	ZZ266	EZZ266	Ligustrum japonicum
E	ZZ266	EZZ266	Ligustrum japonicum
E	ZZ266	EZZ266	Ligustrum japonicum
E	ZZ266	EZZ266	Ligustrum japonicum
E	ZZ266	EZZ266	Ligustrum japonicum
E	ZZ266	EZZ266	Trachycarpus fortunei
E	ZZ266	EZZ266	Trachycarpus fortunei
E	ZZ266	EZZ266	Trachycarpus fortunei
E	ZZ266	EZZ266	Trachycarpus fortunei
E	ZZ266	EZZ266	Trachycarpus fortunei
E	ZZ266	EZZ266	Trachycarpus fortunei
E	ZZ266	EZZ266	Trachycarpus fortunei
E	ZZ266	EZZ266	Prunus cerasifera cv. Atropurpurea
E	ZZ266	EZZ266	Prunus cerasifera cv. Atropurpurea
E	ZZ266	EZZ266	Prunus cerasifera cv. Atropurpurea
E	ZZ266	EZZ266	Prunus cerasifera cv. Atropurpurea
E	ZZ266	EZZ266	Prunus cerasifera cv. Atropurpurea
E	ZZ266	EZZ266	Prunus cerasifera cv. Atropurpurea
E	ZZ266	EZZ266	Photinia serratifolia
E	ZZ266	EZZ266	Photinia serratifolia
E	ZZ266	EZZ266	Photinia serratifolia
E	ZZ266	EZZ266	Photinia serratifolia
E	ZZ266	EZZ266	Photinia serratifolia
E	ZZ266	EZZ266	Photinia serratifolia
E	ZZ266	EZZ266	Juniperus chinensis
E	ZZ266	EZZ266	Buxus sinica var. parvifolia
E	ZZ266	EZZ266	Ligustrum ovalifolium
E	ZZ266	EZZ266	Rosa chinensis
E	ZZ266	EZZ266	Ophiopogon japonicus
E	ZZ266	EZZ266	Oxalis corymbosa
E	ZZ266	EZZ266	Poa annua
E	ZZ267	EZZ267	Fraxinus chinensis
E	ZZ267	EZZ267	Fraxinus chinensis
E	ZZ267	EZZ267	Fraxinus chinensis
E	ZZ267	EZZ267	Fraxinus chinensis
E	ZZ267	EZZ267	Fraxinus chinensis
E	ZZ267	EZZ267	Fraxinus chinensis
E	ZZ267	EZZ267	Fraxinus chinensis
E	ZZ267	EZZ267	Fraxinus chinensis
E	ZZ267	EZZ267	Fraxinus chinensis
E	ZZ267	EZZ267	Fraxinus chinensis
E	ZZ267	EZZ267	Fraxinus chinensis
E	ZZ267	EZZ267	Fraxinus chinensis
E	ZZ267	EZZ267	Fraxinus chinensis
E	ZZ267	EZZ267	Fraxinus chinensis
E	ZZ267	EZZ267	Fraxinus chinensis
E	ZZ267	EZZ267	Fraxinus chinensis
E	ZZ267	EZZ267	Fraxinus chinensis
E	ZZ267	EZZ267	Fraxinus chinensis
E	ZZ267	EZZ267	Fraxinus chinensis
E	ZZ267	EZZ267	Fraxinus chinensis
E	ZZ267	EZZ267	Fraxinus chinensis
E	ZZ267	EZZ267	Fraxinus chinensis
E	ZZ267	EZZ267	Fraxinus chinensis
E	ZZ267	EZZ267	Fraxinus chinensis
E	ZZ267	EZZ267	Fraxinus chinensis
E	ZZ267	EZZ267	Fraxinus chinensis
E	ZZ267	EZZ267	Fraxinus chinensis
E	ZZ267	EZZ267	Fraxinus chinensis
E	ZZ267	EZZ267	Fraxinus chinensis
E	ZZ267	EZZ267	Platycladus orientalis
E	ZZ267	EZZ267	Platycladus orientalis
E	ZZ267	EZZ267	Platycladus orientalis
E	ZZ267	EZZ267	Platycladus orientalis
E	ZZ267	EZZ267	Platycladus orientalis
E	ZZ267	EZZ267	Platycladus orientalis
E	ZZ267	EZZ267	Platycladus orientalis
E	ZZ267	EZZ267	Photinia × fraseri
E	ZZ267	EZZ267	Euonymus japonicus
E	ZZ267	EZZ267	Nandina domestica
E	ZZ267	EZZ267	Pittosporum tobira
E	ZZ267	EZZ267	Ophiopogon japonicus
E	ZZ267	EZZ267	Zephyranthes candida
E	ZZ267	EZZ267	Plantago asiatica
E	ZZ267	EZZ267	Causonis japonica
E	ZZ267	EZZ267	Duchesnea indica
E	ZZ267	EZZ267	Cynodon dactylon
E	ZZ267	EZZ267	Euphorbia maculata
E	ZZ267	EZZ267	Amaranthus blitum
E	ZZ267	EZZ267	Perilla frutescens
E	ZZ267	EZZ267	Artemisia selengensis
E	ZZ267	EZZ267	Cynodon dactylon
E	ZZ267	EZZ267	Dianthus chinensis
E	ZZ267	EZZ267	Sedum lineare
E	ZZ267	EZZ267	Coreopsis basalis
E	ZZ267	EZZ267	Poa annua
E	ZZ267	EZZ267	Erigeron canadensis
E	ZZ267	EZZ267	Rubia cordifolia
E	ZZ267	EZZ267	Humulus scandens
E	ZZ267	EZZ267	Taraxacum mongolicum
E	ZZ268	EZZ268	Salix babylonica
E	ZZ268	EZZ268	Salix babylonica
E	ZZ268	EZZ268	Salix babylonica
E	ZZ268	EZZ268	Salix babylonica
E	ZZ268	EZZ268	Salix babylonica
E	ZZ268	EZZ268	Salix babylonica
E	ZZ268	EZZ268	Salix babylonica
E	ZZ268	EZZ268	Salix babylonica
E	ZZ268	EZZ268	Salix babylonica
E	ZZ268	EZZ268	Salix babylonica
E	ZZ268	EZZ268	Salix babylonica
E	ZZ268	EZZ268	Salix babylonica
E	ZZ268	EZZ268	Salix babylonica
E	ZZ268	EZZ268	Salix babylonica
E	ZZ268	EZZ268	Salix babylonica
E	ZZ268	EZZ268	Salix babylonica
E	ZZ268	EZZ268	Salix babylonica
E	ZZ268	EZZ268	Salix babylonica
E	ZZ268	EZZ268	Salix babylonica
E	ZZ268	EZZ268	Salix babylonica
E	ZZ268	EZZ268	Salix babylonica
E	ZZ268	EZZ268	Firmiana simplex
E	ZZ268	EZZ268	Pinus bungeana
E	ZZ268	EZZ268	Pinus bungeana
E	ZZ268	EZZ268	Pinus bungeana
E	ZZ268	EZZ268	Pinus bungeana
E	ZZ268	EZZ268	Pinus bungeana
E	ZZ268	EZZ268	Pinus bungeana
E	ZZ268	EZZ268	Pinus bungeana
E	ZZ268	EZZ268	Spiraea × vanhouttei
E	ZZ268	EZZ268	Pittosporum tobira
E	ZZ268	EZZ268	Photinia × fraseri
E	ZZ268	EZZ268	Ophiopogon japonicus
E	ZZ268	EZZ268	Poa annua
E	ZZ268	EZZ268	Lolium perenne
E	ZZ268	EZZ268	Festuca rubra
E	ZZ268	EZZ268	Trifolium repens
E	ZZ268	EZZ268	Oxalis corymbosa
E	ZZ268	EZZ268	Euphorbia maculata
E	ZZ268	EZZ268	Causonis japonica
E	ZZ268	EZZ268	Rubia cordifolia
E	ZZ268	EZZ268	Erigeron canadensis
E	ZZ268	EZZ268	Arenaria serpyllifolia
E	ZZ268	EZZ268	Zoysia japonica
E	ZZ269	EZZ269	Magnolia grandiflora var. lanceolata
E	ZZ269	EZZ269	Magnolia grandiflora var. lanceolata
E	ZZ269	EZZ269	Magnolia grandiflora var. lanceolata
E	ZZ269	EZZ269	Magnolia grandiflora var. lanceolata
E	ZZ269	EZZ269	Magnolia grandiflora var. lanceolata
E	ZZ269	EZZ269	Magnolia grandiflora var. lanceolata
E	ZZ269	EZZ269	Magnolia grandiflora var. lanceolata
E	ZZ269	EZZ269	Magnolia grandiflora var. lanceolata
E	ZZ269	EZZ269	Magnolia grandiflora var. lanceolata
E	ZZ269	EZZ269	Magnolia grandiflora var. lanceolata
E	ZZ269	EZZ269	Magnolia grandiflora var. lanceolata
E	ZZ269	EZZ269	Magnolia grandiflora var. lanceolata
E	ZZ269	EZZ269	Magnolia grandiflora var. lanceolata
E	ZZ269	EZZ269	Magnolia grandiflora var. lanceolata
E	ZZ269	EZZ269	Magnolia grandiflora var. lanceolata
E	ZZ269	EZZ269	Magnolia grandiflora var. lanceolata
E	ZZ269	EZZ269	Magnolia grandiflora var. lanceolata
E	ZZ269	EZZ269	Magnolia grandiflora var. lanceolata
E	ZZ269	EZZ269	Magnolia grandiflora var. lanceolata
E	ZZ269	EZZ269	Magnolia grandiflora var. lanceolata
E	ZZ269	EZZ269	Magnolia grandiflora var. lanceolata
E	ZZ269	EZZ269	Magnolia grandiflora var. lanceolata
E	ZZ269	EZZ269	Magnolia grandiflora var. lanceolata
E	ZZ269	EZZ269	Magnolia grandiflora var. lanceolata
E	ZZ269	EZZ269	Juniperus chinensis cv. Kaizuca
E	ZZ269	EZZ269	Juniperus chinensis cv. Kaizuca
E	ZZ269	EZZ269	Juniperus chinensis cv. Kaizuca
E	ZZ269	EZZ269	Juniperus chinensis cv. Kaizuca
E	ZZ269	EZZ269	Juniperus chinensis cv. Kaizuca
E	ZZ269	EZZ269	Prunus persica cv. Duplex
E	ZZ269	EZZ269	Prunus persica cv. Duplex
E	ZZ269	EZZ269	Prunus persica cv. Duplex
E	ZZ269	EZZ269	Prunus persica cv. Duplex
E	ZZ269	EZZ269	Photinia glabra
E	ZZ269	EZZ269	Ligustrum quihoui
E	ZZ269	EZZ269	Iris tectorum
E	ZZ269	EZZ269	Artemisia lavandulifolia
E	ZZ269	EZZ269	Oxalis corymbosa
E	ZZ269	EZZ269	Emilia sonchifolia
E	ZZ269	EZZ269	Chasmanthium latifolium
E	ZZ269	EZZ269	Oenothera biennis
E	ZZ269	EZZ269	Erigeron canadensis
E	ZZ269	EZZ269	Cirsium arvense var. integrifolium
E	ZZ269	EZZ269	Sonchus oleraceus
E	ZZ269	EZZ269	Picris divaricata
E	ZZ269	EZZ269	Ophiopogon japonicus
E	ZZ269	EZZ269	Chenopodium album
E	ZZ269	EZZ269	Poa annua
E	ZZ269	EZZ269	Euphorbia maculata
E	ZZ269	EZZ269	Sedum lineare
E	ZZ269	EZZ269	Causonis japonica
E	ZZ270	EZZ270	Salix babylonica
E	ZZ270	EZZ270	Salix babylonica
E	ZZ270	EZZ270	Salix babylonica
E	ZZ270	EZZ270	Salix babylonica
E	ZZ270	EZZ270	Salix babylonica
E	ZZ270	EZZ270	Prunus cerasifera cv. Atropurpurea
E	ZZ270	EZZ270	Prunus cerasifera cv. Atropurpurea
E	ZZ270	EZZ270	Prunus cerasifera cv. Atropurpurea
E	ZZ270	EZZ270	Prunus cerasifera cv. Atropurpurea
E	ZZ270	EZZ270	Prunus cerasifera cv. Atropurpurea
E	ZZ270	EZZ270	Ligustrum japonicum
E	ZZ270	EZZ270	Ligustrum japonicum
E	ZZ270	EZZ270	Pterocarya stenoptera
E	ZZ270	EZZ270	Pterocarya stenoptera
E	ZZ270	EZZ270	Pterocarya stenoptera
E	ZZ270	EZZ270	Pterocarya stenoptera
E	ZZ270	EZZ270	Pterocarya stenoptera
E	ZZ270	EZZ270	Pterocarya stenoptera
E	ZZ270	EZZ270	Pterocarya stenoptera
E	ZZ270	EZZ270	Pterocarya stenoptera
E	ZZ270	EZZ270	Heteropanax fragrans
E	ZZ270	EZZ270	Heteropanax fragrans
E	ZZ270	EZZ270	Pittosporum tobira
E	ZZ270	EZZ270	Ophiopogon japonicus
E	ZZ270	EZZ270	Poa annua
E	ZZ270	EZZ270	Eleusine indica
E	ZZ270	EZZ270	Cynodon dactylon
E	ZZ270	EZZ270	Symphyotrichum subulatum
E	ZZ270	EZZ270	Erigeron bonariensis
E	ZZ270	EZZ270	Setaria viridis
E	ZZ271	EZZ271	Eucommia ulmoides
E	ZZ271	EZZ271	Eucommia ulmoides
E	ZZ271	EZZ271	Eucommia ulmoides
E	ZZ271	EZZ271	Eucommia ulmoides
E	ZZ271	EZZ271	Cedrus deodara
E	ZZ271	EZZ271	Cedrus deodara
E	ZZ271	EZZ271	Ligustrum japonicum
E	ZZ271	EZZ271	Ligustrum japonicum
E	ZZ271	EZZ271	Ligustrum japonicum
E	ZZ271	EZZ271	Ligustrum japonicum
E	ZZ271	EZZ271	Ligustrum japonicum
E	ZZ271	EZZ271	Ligustrum japonicum
E	ZZ271	EZZ271	Ligustrum japonicum
E	ZZ271	EZZ271	Ligustrum japonicum
E	ZZ271	EZZ271	Ligustrum japonicum
E	ZZ271	EZZ271	Ligustrum japonicum
E	ZZ271	EZZ271	Ligustrum japonicum
E	ZZ271	EZZ271	Ligustrum japonicum
E	ZZ271	EZZ271	Ligustrum japonicum
E	ZZ271	EZZ271	Ligustrum japonicum
E	ZZ271	EZZ271	Ligustrum japonicum
E	ZZ271	EZZ271	Ligustrum japonicum
E	ZZ271	EZZ271	Ligustrum japonicum
E	ZZ271	EZZ271	Broussonetia papyrifera
E	ZZ271	EZZ271	Broussonetia papyrifera
E	ZZ271	EZZ271	Pittosporum tobira
E	ZZ271	EZZ271	Photinia × fraseri
E	ZZ271	EZZ271	Juniperus chinensis
E	ZZ271	EZZ271	Euonymus japonicus
E	ZZ271	EZZ271	Campsis grandiflora
E	ZZ271	EZZ271	Erigeron canadensis
E	ZZ271	EZZ271	Solidago decurrens
E	ZZ271	EZZ271	Chenopodium album
E	ZZ271	EZZ271	Setaria viridis
E	ZZ271	EZZ271	Neotrinia splendens
E	ZZ271	EZZ271	Poa annua
E	ZZ271	EZZ271	Cynanchum auriculatum
E	ZZ271	EZZ271	Vincetoxicum chinense
E	ZZ271	EZZ271	Geranium carolinianum
E	ZZ271	EZZ271	Ophiopogon japonicus
E	ZZ271	EZZ271	Lolium perenne
E	ZZ271	EZZ271	Causonis japonica
E	ZZ271	EZZ271	Humulus scandens
E	ZZ271	EZZ271	Calystegia hederacea
E	ZZ271	EZZ271	Rubia cordifolia
E	ZZ271	EZZ271	Eleusine indica
E	ZZ272	EZZ272	Ginkgo biloba
E	ZZ272	EZZ272	Ginkgo biloba
E	ZZ272	EZZ272	Ginkgo biloba
E	ZZ272	EZZ272	Ginkgo biloba
E	ZZ272	EZZ272	Ginkgo biloba
E	ZZ272	EZZ272	Ginkgo biloba
E	ZZ272	EZZ272	Ginkgo biloba
E	ZZ272	EZZ272	Ginkgo biloba
E	ZZ272	EZZ272	Ginkgo biloba
E	ZZ272	EZZ272	Ginkgo biloba
E	ZZ272	EZZ272	Ginkgo biloba
E	ZZ272	EZZ272	Ginkgo biloba
E	ZZ272	EZZ272	Ginkgo biloba
E	ZZ272	EZZ272	Platanus acerifolia
E	ZZ272	EZZ272	Platanus acerifolia
E	ZZ272	EZZ272	Platanus acerifolia
E	ZZ272	EZZ272	Platanus acerifolia
E	ZZ272	EZZ272	Robinia pseudoacacia
E	ZZ272	EZZ272	Osmanthus fragrans cv. Chenghong Dangui
E	ZZ272	EZZ272	Osmanthus fragrans cv. Chenghong Dangui
E	ZZ272	EZZ272	Osmanthus fragrans cv. Chenghong Dangui
E	ZZ272	EZZ272	Osmanthus fragrans cv. Chenghong Dangui
E	ZZ272	EZZ272	Prunus × yedoensis
E	ZZ272	EZZ272	Prunus × yedoensis
E	ZZ272	EZZ272	Prunus × yedoensis
E	ZZ272	EZZ272	Prunus × yedoensis
E	ZZ272	EZZ272	Prunus × yedoensis
E	ZZ272	EZZ272	Photinia × fraseri
E	ZZ272	EZZ272	Ligustrum ovalifolium
E	ZZ272	EZZ272	Euonymus japonicus
E	ZZ272	EZZ272	Solanum nigrum
E	ZZ272	EZZ272	Setaria viridis
E	ZZ272	EZZ272	Oxalis corymbosa
E	ZZ272	EZZ272	Lolium perenne
E	ZZ272	EZZ272	Capsella bursa-pastoris
E	ZZ272	EZZ272	Amaranthus blitum
E	ZZ272	EZZ272	Chenopodium album
E	ZZ272	EZZ272	Duchesnea indica
E	ZZ272	EZZ272	Cynodon dactylon
E	ZZ272	EZZ272	Erigeron canadensis
E	ZZ272	EZZ272	Humulus scandens
E	ZZ272	EZZ272	Euphorbia maculata
E	ZZ272	EZZ272	Plantago asiatica
E	ZZ272	EZZ272	Sonchus oleraceus
E	ZZ272	EZZ272	Ixeris chinensis
E	ZZ272	EZZ272	Euphorbia helioscopia
E	ZZ272	EZZ272	Picris divaricata
E	ZZ272	EZZ272	Ophiopogon japonicus
E	ZZ272	EZZ272	Iris tectorum
E	ZZ282	EZZ282	Pterocarya stenoptera
E	ZZ282	EZZ282	Pterocarya stenoptera
E	ZZ282	EZZ282	Pterocarya stenoptera
E	ZZ282	EZZ282	Pterocarya stenoptera
E	ZZ282	EZZ282	Pterocarya stenoptera
E	ZZ282	EZZ282	Pterocarya stenoptera
E	ZZ282	EZZ282	Pterocarya stenoptera
E	ZZ282	EZZ282	Pterocarya stenoptera
E	ZZ282	EZZ282	Pterocarya stenoptera
E	ZZ282	EZZ282	Pterocarya stenoptera
E	ZZ282	EZZ282	Pterocarya stenoptera
E	ZZ282	EZZ282	Pterocarya stenoptera
E	ZZ282	EZZ282	Eriobotrya japonica
E	ZZ282	EZZ282	Eriobotrya japonica
E	ZZ282	EZZ282	Eriobotrya japonica
E	ZZ282	EZZ282	Eriobotrya japonica
E	ZZ282	EZZ282	Eriobotrya japonica
E	ZZ282	EZZ282	Eriobotrya japonica
E	ZZ282	EZZ282	Cedrus deodara
E	ZZ282	EZZ282	Cedrus deodara
E	ZZ282	EZZ282	Cedrus deodara
E	ZZ282	EZZ282	Cedrus deodara
E	ZZ282	EZZ282	Cedrus deodara
E	ZZ282	EZZ282	Cedrus deodara
E	ZZ282	EZZ282	Cedrus deodara
E	ZZ282	EZZ282	Cedrus deodara
E	ZZ282	EZZ282	Buxus sinica var. parvifolia
E	ZZ282	EZZ282	Pittosporum tobira
E	ZZ282	EZZ282	Nerium oleander
E	ZZ282	EZZ282	Photinia × fraseri
E	ZZ282	EZZ282	Ophiopogon japonicus
E	ZZ282	EZZ282	Cynodon dactylon
E	ZZ282	EZZ282	Eleusine indica
E	ZZ282	EZZ282	Rubia cordifolia
E	ZZ282	EZZ282	Poa annua
E	ZZ282	EZZ282	Setaria viridis
E	ZZ282	EZZ282	Ixeris chinensis
E	ZZ282	EZZ282	Oxalis corymbosa
E	ZZ282	EZZ282	Elephantopus scaber
E	ZZ282	EZZ282	Euphorbia maculata
E	ZZ283	EZZ283	Yulania denudata cv. Dahua
E	ZZ283	EZZ283	Yulania denudata cv. Dahua
E	ZZ283	EZZ283	Yulania denudata cv. Dahua
E	ZZ283	EZZ283	Yulania denudata cv. Dahua
E	ZZ283	EZZ283	Yulania denudata cv. Dahua
E	ZZ283	EZZ283	Yulania denudata cv. Dahua
E	ZZ283	EZZ283	Yulania denudata cv. Dahua
E	ZZ283	EZZ283	Yulania denudata cv. Dahua
E	ZZ283	EZZ283	Yulania denudata cv. Dahua
E	ZZ283	EZZ283	Yulania denudata cv. Dahua
E	ZZ283	EZZ283	Platanus acerifolia
E	ZZ283	EZZ283	Platanus acerifolia
E	ZZ283	EZZ283	Platanus acerifolia
E	ZZ283	EZZ283	Platanus acerifolia
E	ZZ283	EZZ283	Platanus acerifolia
E	ZZ283	EZZ283	Platanus acerifolia
E	ZZ283	EZZ283	Cinnamomum septentrionale
E	ZZ283	EZZ283	Cinnamomum septentrionale
E	ZZ283	EZZ283	Cinnamomum septentrionale
E	ZZ283	EZZ283	Cinnamomum septentrionale
E	ZZ283	EZZ283	Cinnamomum septentrionale
E	ZZ283	EZZ283	Cinnamomum septentrionale
E	ZZ283	EZZ283	Pittosporum tobira
E	ZZ283	EZZ283	Platycladus orientalis cv. Aurea
E	ZZ283	EZZ283	Nerium oleander
E	ZZ283	EZZ283	Cercis chinensis
E	ZZ283	EZZ283	Trachelospermum jasminoides
E	ZZ283	EZZ283	Hedera nepalensis var. sinensis
E	ZZ283	EZZ283	Ophiopogon japonicus
E	ZZ283	EZZ283	Oxalis corymbosa
E	ZZ283	EZZ283	Cynodon dactylon
E	ZZ283	EZZ283	Microstegium vimineum
E	ZZ283	EZZ283	Causonis japonica
E	ZZ283	EZZ283	Erigeron canadensis
E	ZZ283	EZZ283	Artemisia selengensis
E	ZZ283	EZZ283	Elephantopus scaber
E	ZZ283	EZZ283	Taraxacum mongolicum
E	ZZ283	EZZ283	Euphorbia maculata
E	ZZ283	EZZ283	Veronica persica
E	ZZ283	EZZ283	Eleusine indica
E	ZZ283	EZZ283	Poa annua
E	ZZ283	EZZ283	Ixeris chinensis
E	ZZ283	EZZ283	Chenopodium album
E	ZZ284	EZZ284	Magnolia grandiflora var. lanceolata
E	ZZ284	EZZ284	Magnolia grandiflora var. lanceolata
E	ZZ284	EZZ284	Magnolia grandiflora var. lanceolata
E	ZZ284	EZZ284	Magnolia grandiflora var. lanceolata
E	ZZ284	EZZ284	Magnolia grandiflora var. lanceolata
E	ZZ284	EZZ284	Magnolia grandiflora var. lanceolata
E	ZZ284	EZZ284	Magnolia grandiflora var. lanceolata
E	ZZ284	EZZ284	Magnolia grandiflora var. lanceolata
E	ZZ284	EZZ284	Magnolia grandiflora var. lanceolata
E	ZZ284	EZZ284	Magnolia grandiflora var. lanceolata
E	ZZ284	EZZ284	Magnolia grandiflora var. lanceolata
E	ZZ284	EZZ284	Magnolia grandiflora var. lanceolata
E	ZZ284	EZZ284	Magnolia grandiflora var. lanceolata
E	ZZ284	EZZ284	Magnolia grandiflora var. lanceolata
E	ZZ284	EZZ284	Magnolia grandiflora var. lanceolata
E	ZZ284	EZZ284	Magnolia grandiflora var. lanceolata
E	ZZ284	EZZ284	Magnolia grandiflora var. lanceolata
E	ZZ284	EZZ284	Magnolia grandiflora var. lanceolata
E	ZZ284	EZZ284	Magnolia grandiflora var. lanceolata
E	ZZ284	EZZ284	Magnolia grandiflora var. lanceolata
E	ZZ284	EZZ284	Magnolia grandiflora var. lanceolata
E	ZZ284	EZZ284	Cedrus deodara
E	ZZ284	EZZ284	Cedrus deodara
E	ZZ284	EZZ284	Cedrus deodara
E	ZZ284	EZZ284	Cedrus deodara
E	ZZ284	EZZ284	Cedrus deodara
E	ZZ284	EZZ284	Cedrus deodara
E	ZZ284	EZZ284	Pyracantha fortuneana
E	ZZ284	EZZ284	Photinia × fraseri
E	ZZ284	EZZ284	Euonymus japonicus
E	ZZ284	EZZ284	Liriope muscari
E	ZZ284	EZZ284	Iris tectorum
E	ZZ284	EZZ284	Poa annua
E	ZZ284	EZZ284	Setaria viridis
E	ZZ284	EZZ284	Cynodon dactylon
E	ZZ284	EZZ284	Agropyron cristatum
E	ZZ284	EZZ284	Portulaca oleracea
E	ZZ284	EZZ284	Veronica persica
E	ZZ284	EZZ284	Rubia cordifolia
E	ZZ284	EZZ284	Erigeron canadensis
E	ZZ284	EZZ284	Ixeris chinensis
E	ZZ284	EZZ284	Oxalis corymbosa
E	ZZ284	EZZ284	Sonchus oleraceus
E	ZZ284	EZZ284	Euphorbia maculata
E	ZZ284	EZZ284	Chenopodium album
E	ZZ285	EZZ285	Platanus acerifolia
E	ZZ285	EZZ285	Platanus acerifolia
E	ZZ285	EZZ285	Platanus acerifolia
E	ZZ285	EZZ285	Platanus acerifolia
E	ZZ285	EZZ285	Platanus acerifolia
E	ZZ285	EZZ285	Platanus acerifolia
E	ZZ285	EZZ285	Ligustrum japonicum
E	ZZ285	EZZ285	Ligustrum japonicum
E	ZZ285	EZZ285	Ligustrum japonicum
E	ZZ285	EZZ285	Ligustrum japonicum
E	ZZ285	EZZ285	Ligustrum japonicum
E	ZZ285	EZZ285	Ligustrum japonicum
E	ZZ285	EZZ285	Albizia julibrissin
E	ZZ285	EZZ285	Koelreuteria paniculata
E	ZZ285	EZZ285	Koelreuteria paniculata
E	ZZ285	EZZ285	Koelreuteria paniculata
E	ZZ285	EZZ285	Koelreuteria paniculata
E	ZZ285	EZZ285	Koelreuteria paniculata
E	ZZ285	EZZ285	Koelreuteria paniculata
E	ZZ285	EZZ285	Rosa chinensis
E	ZZ285	EZZ285	Photinia × fraseri
E	ZZ285	EZZ285	Euonymus japonicus
E	ZZ285	EZZ285	Punica granatum
E	ZZ285	EZZ285	Oxalis corymbosa
E	ZZ285	EZZ285	Trifolium repens
E	ZZ285	EZZ285	Liriope muscari
E	ZZ285	EZZ285	Lolium perenne
E	ZZ285	EZZ285	Sonchus oleraceus
E	ZZ285	EZZ285	Taraxacum mongolicum
E	ZZ285	EZZ285	Cynodon dactylon
E	ZZ285	EZZ285	Euphorbia maculata
E	ZZ285	EZZ285	Zephyranthes candida
E	ZZ285	EZZ285	Ixeris chinensis
E	ZZ285	EZZ285	Poa annua
E	ZZ285	EZZ285	Rubia cordifolia
E	ZZ285	EZZ285	Amaranthus blitum
E	ZZ285	EZZ285	Causonis japonica
E	ZZ285	EZZ285	Fragaria vesca
E	ZZ285	EZZ285	Erigeron canadensis
E	ZZ285	EZZ285	Agropyron cristatum
E	ZZ286	EZZ286	Platanus acerifolia
E	ZZ286	EZZ286	Platanus acerifolia
E	ZZ286	EZZ286	Platanus acerifolia
E	ZZ286	EZZ286	Platanus acerifolia
E	ZZ286	EZZ286	Platanus acerifolia
E	ZZ286	EZZ286	Platanus acerifolia
E	ZZ286	EZZ286	Photinia serratifolia
E	ZZ286	EZZ286	Photinia serratifolia
E	ZZ286	EZZ286	Photinia serratifolia
E	ZZ286	EZZ286	Photinia serratifolia
E	ZZ286	EZZ286	Photinia serratifolia
E	ZZ286	EZZ286	Photinia serratifolia
E	ZZ286	EZZ286	Photinia serratifolia
E	ZZ286	EZZ286	Photinia serratifolia
E	ZZ286	EZZ286	Photinia serratifolia
E	ZZ286	EZZ286	Photinia serratifolia
E	ZZ286	EZZ286	Photinia serratifolia
E	ZZ286	EZZ286	Photinia serratifolia
E	ZZ286	EZZ286	Hibiscus syriacus
E	ZZ286	EZZ286	Hibiscus syriacus
E	ZZ286	EZZ286	Hibiscus syriacus
E	ZZ286	EZZ286	Hibiscus syriacus
E	ZZ286	EZZ286	Albizia julibrissin
E	ZZ286	EZZ286	Albizia julibrissin
E	ZZ286	EZZ286	Albizia julibrissin
E	ZZ286	EZZ286	Buxus megistophylla
E	ZZ286	EZZ286	Photinia × fraseri
E	ZZ286	EZZ286	Ophiopogon bodinieri
E	ZZ286	EZZ286	Iris tectorum
E	ZZ286	EZZ286	Dianthus chinensis
E	ZZ286	EZZ286	Sedum lineare
E	ZZ286	EZZ286	Cynodon dactylon
E	ZZ286	EZZ286	Taraxacum mongolicum
E	ZZ287	EZZ287	Acer miyabei
E	ZZ287	EZZ287	Platanus acerifolia
E	ZZ287	EZZ287	Platanus acerifolia
E	ZZ287	EZZ287	Platanus acerifolia
E	ZZ287	EZZ287	Platanus acerifolia
E	ZZ287	EZZ287	Platanus acerifolia
E	ZZ287	EZZ287	Platanus acerifolia
E	ZZ287	EZZ287	Photinia serratifolia
E	ZZ287	EZZ287	Photinia serratifolia
E	ZZ287	EZZ287	Photinia serratifolia
E	ZZ287	EZZ287	Photinia serratifolia
E	ZZ287	EZZ287	Salix babylonica
E	ZZ287	EZZ287	Salix babylonica
E	ZZ287	EZZ287	Salix babylonica
E	ZZ287	EZZ287	Salix babylonica
E	ZZ287	EZZ287	Ginkgo biloba
E	ZZ287	EZZ287	Prunus × yedoensis
E	ZZ287	EZZ287	Koelreuteria paniculata
E	ZZ287	EZZ287	Pittosporum tobira
E	ZZ287	EZZ287	Photinia × fraseri
E	ZZ287	EZZ287	Nerium oleander
E	ZZ287	EZZ287	Ophiopogon japonicus
E	ZZ287	EZZ287	Zephyranthes candida
E	ZZ287	EZZ287	Cynodon dactylon
E	ZZ287	EZZ287	Euphorbia maculata
E	ZZ287	EZZ287	Lolium perenne
E	ZZ287	EZZ287	Erigeron bonariensis
E	ZZ287	EZZ287	Poa annua
E	ZZ287	EZZ287	Setaria viridis
E	ZZ287	EZZ287	Eleusine indica
E	ZZ287	EZZ287	Erigeron canadensis
E	ZZ287	EZZ287	Cirsium arvense var. integrifolium
E	ZZ297	EZZ297	Platanus acerifolia
E	ZZ297	EZZ297	Platanus acerifolia
E	ZZ297	EZZ297	Platanus acerifolia
E	ZZ297	EZZ297	Platanus acerifolia
E	ZZ297	EZZ297	Platanus acerifolia
E	ZZ297	EZZ297	Platanus acerifolia
E	ZZ297	EZZ297	Platanus acerifolia
E	ZZ297	EZZ297	Platanus acerifolia
E	ZZ297	EZZ297	Ligustrum lucidum
E	ZZ297	EZZ297	Ligustrum lucidum
E	ZZ297	EZZ297	Ligustrum lucidum
E	ZZ297	EZZ297	Ligustrum lucidum
E	ZZ297	EZZ297	Euonymus japonicus
E	ZZ297	EZZ297	Photinia × fraseri
E	ZZ297	EZZ297	Pittosporum tobira
E	ZZ297	EZZ297	Cynodon dactylon
E	ZZ297	EZZ297	Lolium perenne
E	ZZ297	EZZ297	Dianthus chinensis
E	ZZ297	EZZ297	Coreopsis basalis
E	ZZ297	EZZ297	Sedum lineare
E	ZZ297	EZZ297	Ophiopogon japonicus
E	ZZ297	EZZ297	Cirsium arvense var. integrifolium
E	ZZ299	EZZ299	Robinia pseudoacacia
E	ZZ299	EZZ299	Robinia pseudoacacia
E	ZZ299	EZZ299	Robinia pseudoacacia
E	ZZ299	EZZ299	Robinia pseudoacacia
E	ZZ299	EZZ299	Robinia pseudoacacia
E	ZZ299	EZZ299	Robinia pseudoacacia
E	ZZ299	EZZ299	Robinia pseudoacacia
E	ZZ299	EZZ299	Robinia pseudoacacia
E	ZZ299	EZZ299	Robinia pseudoacacia
E	ZZ299	EZZ299	Robinia pseudoacacia
E	ZZ299	EZZ299	Robinia pseudoacacia
E	ZZ299	EZZ299	Robinia pseudoacacia
E	ZZ299	EZZ299	Robinia pseudoacacia
E	ZZ299	EZZ299	Robinia pseudoacacia
E	ZZ299	EZZ299	Robinia pseudoacacia
E	ZZ299	EZZ299	Robinia pseudoacacia
E	ZZ299	EZZ299	Robinia pseudoacacia
E	ZZ299	EZZ299	Robinia pseudoacacia
E	ZZ299	EZZ299	Salix matsudana
E	ZZ299	EZZ299	Salix matsudana
E	ZZ299	EZZ299	Salix matsudana
E	ZZ299	EZZ299	Salix matsudana
E	ZZ299	EZZ299	Juniperus chinensis cv. Kaizuca
E	ZZ299	EZZ299	Juniperus chinensis cv. Kaizuca
E	ZZ299	EZZ299	Juniperus chinensis cv. Kaizuca
E	ZZ299	EZZ299	Juniperus chinensis cv. Kaizuca
E	ZZ299	EZZ299	Viburnum odoratissimum
E	ZZ299	EZZ299	Photinia × fraseri
E	ZZ299	EZZ299	Ligustrum ovalifolium
E	ZZ299	EZZ299	Photinia serratifolia
E	ZZ299	EZZ299	Cynodon dactylon
E	ZZ299	EZZ299	Ophiopogon japonicus
E	ZZ299	EZZ299	Zephyranthes candida
E	ZZ299	EZZ299	Cirsium arvense var. integrifolium
E	ZZ299	EZZ299	Chenopodium album
E	ZZ299	EZZ299	Lycium chinense
E	ZZ299	EZZ299	Iris tectorum
E	ZZ300	EZZ300	Firmiana simplex
E	ZZ300	EZZ300	Firmiana simplex
E	ZZ300	EZZ300	Firmiana simplex
E	ZZ300	EZZ300	Firmiana simplex
E	ZZ300	EZZ300	Firmiana simplex
E	ZZ300	EZZ300	Firmiana simplex
E	ZZ300	EZZ300	Firmiana simplex
E	ZZ300	EZZ300	Firmiana simplex
E	ZZ300	EZZ300	Firmiana simplex
E	ZZ300	EZZ300	Firmiana simplex
E	ZZ300	EZZ300	Prunus cerasifera cv. Atropurpurea
E	ZZ300	EZZ300	Prunus cerasifera cv. Atropurpurea
E	ZZ300	EZZ300	Prunus cerasifera cv. Atropurpurea
E	ZZ300	EZZ300	Prunus cerasifera cv. Atropurpurea
E	ZZ300	EZZ300	Prunus cerasifera cv. Atropurpurea
E	ZZ300	EZZ300	Prunus cerasifera cv. Atropurpurea
E	ZZ300	EZZ300	Prunus cerasifera cv. Atropurpurea
E	ZZ300	EZZ300	Prunus cerasifera cv. Atropurpurea
E	ZZ300	EZZ300	Prunus cerasifera cv. Atropurpurea
E	ZZ300	EZZ300	Prunus cerasifera cv. Atropurpurea
E	ZZ300	EZZ300	Prunus persica cv. Duplex
E	ZZ300	EZZ300	Prunus persica cv. Duplex
E	ZZ300	EZZ300	Prunus persica cv. Duplex
E	ZZ300	EZZ300	Prunus persica cv. Duplex
E	ZZ300	EZZ300	Prunus persica cv. Duplex
E	ZZ300	EZZ300	Prunus persica cv. Duplex
E	ZZ300	EZZ300	Buxus megistophylla
E	ZZ300	EZZ300	Nerium oleander
E	ZZ300	EZZ300	Pittosporum tobira
E	ZZ300	EZZ300	Photinia × fraseri
E	ZZ300	EZZ300	Jasminum nudiflorum
E	ZZ300	EZZ300	Erigeron canadensis
E	ZZ300	EZZ300	Iris tectorum
E	ZZ300	EZZ300	Coreopsis basalis
E	ZZ300	EZZ300	Viola philippica
E	ZZ300	EZZ300	Picris divaricata
E	ZZ300	EZZ300	Amaranthus blitum
E	ZZ300	EZZ300	Euphorbia maculata
E	ZZ300	EZZ300	Panicum repens
E	ZZ300	EZZ300	Ophiopogon japonicus
E	ZZ300	EZZ300	Chenopodium album
E	ZZ300	EZZ300	Poa annua
E	ZZ300	EZZ300	Cirsium arvense var. integrifolium
E	ZZ300	EZZ300	Plantago asiatica
E	ZZ301	EZZ301	Broussonetia papyrifera
E	ZZ301	EZZ301	Broussonetia papyrifera
E	ZZ301	EZZ301	Broussonetia papyrifera
E	ZZ301	EZZ301	Broussonetia papyrifera
E	ZZ301	EZZ301	Broussonetia papyrifera
E	ZZ301	EZZ301	Broussonetia papyrifera
E	ZZ301	EZZ301	Broussonetia papyrifera
E	ZZ301	EZZ301	Populus tomentosa
E	ZZ301	EZZ301	Populus tomentosa
E	ZZ301	EZZ301	Populus tomentosa
E	ZZ301	EZZ301	Populus tomentosa
E	ZZ301	EZZ301	Robinia pseudoacacia
E	ZZ301	EZZ301	Robinia pseudoacacia
E	ZZ301	EZZ301	Robinia pseudoacacia
E	ZZ301	EZZ301	Robinia pseudoacacia
E	ZZ301	EZZ301	Robinia pseudoacacia
E	ZZ301	EZZ301	Echinochloa crus-galli
E	ZZ301	EZZ301	Humulus scandens
E	ZZ301	EZZ301	Chenopodium album
E	ZZ301	EZZ301	Artemisia lavandulifolia
E	ZZ301	EZZ301	Sonchus oleraceus
E	ZZ301	EZZ301	Rumex dentatus
E	ZZ301	EZZ301	Oenothera laciniata
E	ZZ301	EZZ301	Erigeron canadensis
E	ZZ301	EZZ301	Ixeris chinensis
E	ZZ301	EZZ301	Arenaria serpyllifolia
E	ZZ301	EZZ301	Trigonotis peduncularis
E	ZZ301	EZZ301	Capsella bursa-pastoris
E	ZZ301	EZZ301	Setaria viridis
E	ZZ301	EZZ301	Cirsium arvense var. integrifolium
E	ZZ301	EZZ301	Artemisia annua
E	ZZ301	EZZ301	Imperata cylindrica
E	ZZ301	EZZ301	Cynodon dactylon
E	ZZ301	EZZ301	Scorzonera albicaulis
E	ZZ301	EZZ301	Bromus catharticus
E	ZZ301	EZZ301	Eleusine indica
E	ZZ301	EZZ301	Digitaria sanguinalis
E	ZZ301	EZZ301	Plantago asiatica
E	ZZ301	EZZ301	Taraxacum mongolicum
E	ZZ305	EZZ305	Triadica sebifera
E	ZZ305	EZZ305	Triadica sebifera
E	ZZ305	EZZ305	Triadica sebifera
E	ZZ305	EZZ305	Triadica sebifera
E	ZZ305	EZZ305	Ligustrum vulgare
E	ZZ305	EZZ305	Ligustrum vulgare
E	ZZ305	EZZ305	Ligustrum vulgare
E	ZZ305	EZZ305	Ligustrum vulgare
E	ZZ305	EZZ305	Fraxinus excelsior
E	ZZ305	EZZ305	Fraxinus excelsior
E	ZZ305	EZZ305	Fraxinus excelsior
E	ZZ305	EZZ305	Fraxinus excelsior
E	ZZ305	EZZ305	Fraxinus excelsior
E	ZZ305	EZZ305	Fraxinus excelsior
E	ZZ305	EZZ305	Fraxinus excelsior
E	ZZ305	EZZ305	Fraxinus excelsior
E	ZZ305	EZZ305	Fraxinus excelsior
E	ZZ305	EZZ305	Fraxinus excelsior
E	ZZ305	EZZ305	Fraxinus excelsior
E	ZZ305	EZZ305	Fraxinus excelsior
E	ZZ305	EZZ305	Fraxinus excelsior
E	ZZ305	EZZ305	Acer palmatum cv. Atropurpureum
E	ZZ305	EZZ305	Acer palmatum cv. Atropurpureum
E	ZZ305	EZZ305	Acer palmatum cv. Atropurpureum
E	ZZ305	EZZ305	Acer palmatum cv. Atropurpureum
E	ZZ305	EZZ305	Pinus thunbergii
E	ZZ305	EZZ305	Pinus thunbergii
E	ZZ305	EZZ305	Pinus thunbergii
E	ZZ305	EZZ305	Pinus thunbergii
E	ZZ305	EZZ305	Ginkgo biloba
E	ZZ305	EZZ305	Ginkgo biloba
E	ZZ305	EZZ305	Ginkgo biloba
E	ZZ305	EZZ305	Magnolia grandiflora var. lanceolata
E	ZZ305	EZZ305	Magnolia grandiflora var. lanceolata
E	ZZ305	EZZ305	Ligustrum japonicum
E	ZZ305	EZZ305	Chrysojasminum floridum
E	ZZ305	EZZ305	Rosa multiflora
E	ZZ305	EZZ305	Photinia × fraseri
E	ZZ305	EZZ305	Ligustrum sinense
E	ZZ305	EZZ305	Berberis thunbergii cv. Atropurpurea
E	ZZ305	EZZ305	Setaria viridis
E	ZZ305	EZZ305	Cynodon dactylon
E	ZZ305	EZZ305	Ixeris chinensis
E	ZZ305	EZZ305	Cirsium arvense var. integrifolium
E	ZZ305	EZZ305	Erigeron canadensis
E	ZZ305	EZZ305	Veronica arvensis
E	ZZ305	EZZ305	Dianthus chinensis
E	ZZ305	EZZ305	Oenothera lindheimeri
E	ZZ305	EZZ305	Lolium perenne
E	ZZ305	EZZ305	Pennisetum alopecuroides
E	ZZ305	EZZ305	Chenopodium album
E	ZZ305	EZZ305	Zoysia pacifica
E	ZZ305	EZZ305	Humulus scandens
E	ZZ305	EZZ305	Triticum aestivum
E	ZZ305	EZZ305	Ophiopogon japonicus
E	ZZ305	EZZ305	Artemisia scoparia
E	ZZ305	EZZ305	Geranium carolinianum
E	ZZ305	EZZ305	Cirsium arvense var. integrifolium
E	ZZ305	EZZ305	Sonchus oleraceus
E	ZZ306	EZZ306	Platanus acerifolia
E	ZZ306	EZZ306	Platanus acerifolia
E	ZZ306	EZZ306	Platanus acerifolia
E	ZZ306	EZZ306	Platanus acerifolia
E	ZZ306	EZZ306	Platanus acerifolia
E	ZZ306	EZZ306	Platanus acerifolia
E	ZZ306	EZZ306	Platanus acerifolia
E	ZZ306	EZZ306	Platanus acerifolia
E	ZZ306	EZZ306	Ligustrum lucidum
E	ZZ306	EZZ306	Ligustrum lucidum
E	ZZ306	EZZ306	Ligustrum lucidum
E	ZZ306	EZZ306	Ligustrum lucidum
E	ZZ306	EZZ306	Ginkgo biloba
E	ZZ306	EZZ306	Ginkgo biloba
E	ZZ306	EZZ306	Ginkgo biloba
E	ZZ306	EZZ306	Ginkgo biloba
E	ZZ306	EZZ306	Ginkgo biloba
E	ZZ306	EZZ306	Ginkgo biloba
E	ZZ306	EZZ306	Ginkgo biloba
E	ZZ306	EZZ306	Ginkgo biloba
E	ZZ306	EZZ306	Ginkgo biloba
E	ZZ306	EZZ306	Ginkgo biloba
E	ZZ306	EZZ306	Ginkgo biloba
E	ZZ306	EZZ306	Ginkgo biloba
E	ZZ306	EZZ306	Salix babylonica
E	ZZ306	EZZ306	Photinia serratifolia
E	ZZ306	EZZ306	Photinia serratifolia
E	ZZ306	EZZ306	Photinia serratifolia
E	ZZ306	EZZ306	Photinia serratifolia
E	ZZ306	EZZ306	Photinia serratifolia
E	ZZ306	EZZ306	Photinia serratifolia
E	ZZ306	EZZ306	Photinia serratifolia
E	ZZ306	EZZ306	Photinia serratifolia
E	ZZ306	EZZ306	Photinia × fraseri
E	ZZ306	EZZ306	Nerium oleander
E	ZZ306	EZZ306	Pittosporum tobira
E	ZZ306	EZZ306	Ophiopogon japonicus
E	ZZ306	EZZ306	Cynodon dactylon
E	ZZ306	EZZ306	Cyperus rotundus
E	ZZ306	EZZ306	Iris tectorum
E	ZZ306	EZZ306	Setaria viridis
E	ZZ306	EZZ306	Erigeron canadensis
E	ZZ306	EZZ306	Petunia × hybrida
E	ZZ306	EZZ306	Humulus scandens
E	ZZ306	EZZ306	Helianthus maximiliani
E	ZZ306	EZZ306	Momordica charantia
E	ZZ306	EZZ306	Dysphania ambrosioides
E	ZZ306	EZZ306	Amaranthus blitum
E	ZZ306	EZZ306	Sonchus oleraceus
E	ZZ306	EZZ306	Artemisia argyi
E	ZZ306	EZZ306	Calystegia hederacea
E	ZZ306	EZZ306	Chenopodium album
E	ZZ306	EZZ306	Artemisia capillaris
E	ZZ306	EZZ306	Ixeris chinensis
E	ZZ306	EZZ306	Verbascum thapsus
E	ZZ306	EZZ306	Causonis japonica
E	ZZ306	EZZ306	Geranium carolinianum
E	ZZ307	EZZ307	Robinia pseudoacacia
E	ZZ307	EZZ307	Robinia pseudoacacia
E	ZZ307	EZZ307	Robinia pseudoacacia
E	ZZ307	EZZ307	Platanus acerifolia
E	ZZ307	EZZ307	Platanus acerifolia
E	ZZ307	EZZ307	Platanus acerifolia
E	ZZ307	EZZ307	Cedrus deodara
E	ZZ307	EZZ307	Cedrus deodara
E	ZZ307	EZZ307	Cedrus deodara
E	ZZ307	EZZ307	Cedrus deodara
E	ZZ307	EZZ307	Cedrus deodara
E	ZZ307	EZZ307	Lagerstroemia indica
E	ZZ307	EZZ307	Lagerstroemia indica
E	ZZ307	EZZ307	Lagerstroemia indica
E	ZZ307	EZZ307	Lagerstroemia indica
E	ZZ307	EZZ307	Lagerstroemia indica
E	ZZ307	EZZ307	Lagerstroemia indica
E	ZZ307	EZZ307	Lagerstroemia indica
E	ZZ307	EZZ307	Lagerstroemia indica
E	ZZ307	EZZ307	Lagerstroemia indica
E	ZZ307	EZZ307	Lagerstroemia indica
E	ZZ307	EZZ307	Lagerstroemia indica
E	ZZ307	EZZ307	Lagerstroemia indica
E	ZZ307	EZZ307	Lagerstroemia indica
E	ZZ307	EZZ307	Lagerstroemia indica
E	ZZ307	EZZ307	Lagerstroemia indica
E	ZZ307	EZZ307	Lagerstroemia indica
E	ZZ307	EZZ307	Lagerstroemia indica
E	ZZ307	EZZ307	Rosa multiflora
E	ZZ307	EZZ307	Euonymus japonicus
E	ZZ307	EZZ307	Rosa chinensis
E	ZZ307	EZZ307	Cercis chinensis
E	ZZ307	EZZ307	Oxalis corymbosa
E	ZZ307	EZZ307	Veronica arvensis
E	ZZ307	EZZ307	Erigeron canadensis
E	ZZ307	EZZ307	Echinacea purpurea
E	ZZ307	EZZ307	Iris tectorum
E	ZZ307	EZZ307	Cortaderia selloana
E	ZZ307	EZZ307	Artemisia argyi
E	ZZ307	EZZ307	Lolium perenne
E	ZZ307	EZZ307	Rumex dentatus
E	ZZ307	EZZ307	Fragaria vesca
E	ZZ307	EZZ307	Oenothera lindheimeri
E	ZZ307	EZZ307	Bromus catharticus
E	ZZ307	EZZ307	Ixeris chinensis
E	ZZ307	EZZ307	Cirsium arvense var. integrifolium
E	ZZ307	EZZ307	Setaria viridis
E	ZZ307	EZZ307	Cynodon dactylon
E	ZZ307	EZZ307	Lavandula angustifolia
E	ZZ308	EZZ308	Styphnolobium japonicum
E	ZZ308	EZZ308	Styphnolobium japonicum
E	ZZ308	EZZ308	Styphnolobium japonicum
E	ZZ308	EZZ308	Styphnolobium japonicum
E	ZZ308	EZZ308	Platanus acerifolia
E	ZZ308	EZZ308	Platanus acerifolia
E	ZZ308	EZZ308	Platanus acerifolia
E	ZZ308	EZZ308	Platanus acerifolia
E	ZZ308	EZZ308	Platanus acerifolia
E	ZZ308	EZZ308	Prunus × yedoensis
E	ZZ308	EZZ308	Prunus × yedoensis
E	ZZ308	EZZ308	Prunus × yedoensis
E	ZZ308	EZZ308	Prunus × yedoensis
E	ZZ308	EZZ308	Prunus × yedoensis
E	ZZ308	EZZ308	Prunus × yedoensis
E	ZZ308	EZZ308	Trachycarpus fortunei
E	ZZ308	EZZ308	Trachycarpus fortunei
E	ZZ308	EZZ308	Trachycarpus fortunei
E	ZZ308	EZZ308	Trachycarpus fortunei
E	ZZ308	EZZ308	Trachycarpus fortunei
E	ZZ308	EZZ308	Trachycarpus fortunei
E	ZZ308	EZZ308	Ginkgo biloba
E	ZZ308	EZZ308	Malus spectabilis
E	ZZ308	EZZ308	Malus spectabilis
E	ZZ308	EZZ308	Malus spectabilis
E	ZZ308	EZZ308	Malus spectabilis
E	ZZ308	EZZ308	Malus spectabilis
E	ZZ308	EZZ308	Malus spectabilis
E	ZZ308	EZZ308	Lagerstroemia indica
E	ZZ308	EZZ308	Lagerstroemia indica
E	ZZ308	EZZ308	Lagerstroemia indica
E	ZZ308	EZZ308	Lagerstroemia indica
E	ZZ308	EZZ308	Lagerstroemia indica
E	ZZ308	EZZ308	Lagerstroemia indica
E	ZZ308	EZZ308	Lagerstroemia indica
E	ZZ308	EZZ308	Lagerstroemia indica
E	ZZ308	EZZ308	Lagerstroemia indica
E	ZZ308	EZZ308	Lagerstroemia indica
E	ZZ308	EZZ308	Lagerstroemia indica
E	ZZ308	EZZ308	Lagerstroemia indica
E	ZZ308	EZZ308	Lagerstroemia indica
E	ZZ308	EZZ308	Lagerstroemia indica
E	ZZ308	EZZ308	Lagerstroemia indica
E	ZZ308	EZZ308	Lagerstroemia indica
E	ZZ308	EZZ308	Lagerstroemia indica
E	ZZ308	EZZ308	Lagerstroemia indica
E	ZZ308	EZZ308	Lagerstroemia indica
E	ZZ308	EZZ308	Lagerstroemia indica
E	ZZ308	EZZ308	Lagerstroemia indica
E	ZZ308	EZZ308	Lagerstroemia indica
E	ZZ308	EZZ308	Lagerstroemia indica
E	ZZ308	EZZ308	Lagerstroemia indica
E	ZZ308	EZZ308	Lagerstroemia indica
E	ZZ308	EZZ308	Buxus megistophylla
E	ZZ308	EZZ308	Ligustrum sinense
E	ZZ308	EZZ308	Photinia × fraseri
E	ZZ308	EZZ308	Cercis chinensis
E	ZZ308	EZZ308	Cynodon dactylon
E	ZZ308	EZZ308	Oxalis pes-caprae
E	ZZ308	EZZ308	Dichondra micrantha
E	ZZ308	EZZ308	Ophiopogon japonicus
E	ZZ308	EZZ308	Poa annua
E	ZZ308	EZZ308	Oxalis corymbosa
E	ZZ308	EZZ308	Plantago asiatica
E	ZZ308	EZZ308	Veronica polita
E	ZZ308	EZZ308	Causonis japonica
E	ZZ308	EZZ308	Elephantopus scaber
E	ZZ325	EZZ325	Ginkgo biloba
E	ZZ325	EZZ325	Ginkgo biloba
E	ZZ325	EZZ325	Ginkgo biloba
E	ZZ325	EZZ325	Ginkgo biloba
E	ZZ325	EZZ325	Ginkgo biloba
E	ZZ325	EZZ325	Ginkgo biloba
E	ZZ325	EZZ325	Ginkgo biloba
E	ZZ325	EZZ325	Ginkgo biloba
E	ZZ325	EZZ325	Ginkgo biloba
E	ZZ325	EZZ325	Ginkgo biloba
E	ZZ325	EZZ325	Ginkgo biloba
E	ZZ325	EZZ325	Ginkgo biloba
E	ZZ325	EZZ325	Ginkgo biloba
E	ZZ325	EZZ325	Ginkgo biloba
E	ZZ325	EZZ325	Ginkgo biloba
E	ZZ325	EZZ325	Ginkgo biloba
E	ZZ325	EZZ325	Ginkgo biloba
E	ZZ325	EZZ325	Ginkgo biloba
E	ZZ325	EZZ325	Ginkgo biloba
E	ZZ325	EZZ325	Ginkgo biloba
E	ZZ325	EZZ325	Ginkgo biloba
E	ZZ325	EZZ325	Ginkgo biloba
E	ZZ325	EZZ325	Ginkgo biloba
E	ZZ325	EZZ325	Ginkgo biloba
E	ZZ325	EZZ325	Ginkgo biloba
E	ZZ325	EZZ325	Prunus cerasifera cv. Atropurpurea
E	ZZ325	EZZ325	Prunus cerasifera cv. Atropurpurea
E	ZZ325	EZZ325	Prunus cerasifera cv. Atropurpurea
E	ZZ325	EZZ325	Prunus cerasifera cv. Atropurpurea
E	ZZ325	EZZ325	Prunus cerasifera cv. Atropurpurea
E	ZZ325	EZZ325	Prunus cerasifera cv. Atropurpurea
E	ZZ325	EZZ325	Prunus cerasifera cv. Atropurpurea
E	ZZ325	EZZ325	Prunus cerasifera cv. Atropurpurea
E	ZZ325	EZZ325	Prunus cerasifera cv. Atropurpurea
E	ZZ325	EZZ325	Prunus cerasifera cv. Atropurpurea
E	ZZ325	EZZ325	Prunus cerasifera cv. Atropurpurea
E	ZZ325	EZZ325	Prunus cerasifera cv. Atropurpurea
E	ZZ325	EZZ325	Prunus cerasifera cv. Atropurpurea
E	ZZ325	EZZ325	Photinia serratifolia
E	ZZ325	EZZ325	Photinia serratifolia
E	ZZ325	EZZ325	Photinia serratifolia
E	ZZ325	EZZ325	Platanus acerifolia
[truncated: 5,251 more rows]
